# Supplementary material for: Mat Pilates and aquatic aerobic exercises for women with fibromyalgia: a protocol for a randomised controlled blind study
Source: PubMed Central journal article supplement — BMJ Open. 2019 Feb 6;9(2):e022306. doi: 10.1136/bmjopen-2018-022306 (PMC6377548; doi:10.1136/bmjopen-2018-022306), 2019-02-06
Supplement: bmjopen-2018-022306.draft_revisions.pdf [file bmjopen-2018-022306.draft_revisions.pdf]

# BMJ Open

BMJ Open is committed to open peer review. As part of this commitment we make the peer review history of every article we publish publicly available.

When an article is published we post the peer reviewers' comments and the authors' responses online. We also post the versions of the paper that were used during peer review. These are the versions that the peer review comments apply to.

The versions of the paper that follow are the versions that were submitted during the peer review process. They are not the versions of record or the final published versions. They should not be cited or distributed as the published version of this manuscript.

BMJ Open is an open access journal and the full, final, typeset and author-corrected version of record of the manuscript is available on our site with no access controls, subscription charges or pay-per-view fees (<http://bmjopen.bmj.com>).

If you have any questions on BMJ Open's open peer review process please email [info.bmjopen@bmj.com](mailto:info.bmjopen@bmj.com)

# BMJ Open

## Mat Pilates and aquatic aerobic exercises for women with fibromyalgia. A protocol for a randomized controlled blind study

|                               |                                                                                                                                                                                                                                                                                                                                                                                                                                                                                                                                                                     |
|-------------------------------|---------------------------------------------------------------------------------------------------------------------------------------------------------------------------------------------------------------------------------------------------------------------------------------------------------------------------------------------------------------------------------------------------------------------------------------------------------------------------------------------------------------------------------------------------------------------|
| Journal:                      | <i>BMJ Open</i>                                                                                                                                                                                                                                                                                                                                                                                                                                                                                                                                                     |
| Manuscript ID                 | bmjopen-2018-022306                                                                                                                                                                                                                                                                                                                                                                                                                                                                                                                                                 |
| Article Type:                 | Protocol                                                                                                                                                                                                                                                                                                                                                                                                                                                                                                                                                            |
| Date Submitted by the Author: | 16-Feb-2018                                                                                                                                                                                                                                                                                                                                                                                                                                                                                                                                                         |
| Complete List of Authors:     | Lins, Caio Alano de Almeida; Universidade Federal do Rio Grande do Norte, Faculdade de Ciências da Saúde do Trairi<br>Nobre, Thaiza Teixeira Xavier ; Universidade Federal do Rio Grande do Norte, Faculdade de Ciências da Saúde do Trairi<br>de Sousa, Vanessa Patrícia Soares ; Universidade Federal do Rio Grande do Norte, Faculdade de Ciências da Saúde do Trairi<br>Caldas, Renata Trajano Jorge ; Faculdade Santa Terezinha, Fisioterapia de Souza, Marcelo Cardoso; Universidade Federal do Rio Grande do Norte, Faculdade de Ciências da Saúde do Trairi |
| Keywords:                     | fibromyalgia, Pilates, aerobic exercise                                                                                                                                                                                                                                                                                                                                                                                                                                                                                                                             |
|                               |                                                                                                                                                                                                                                                                                                                                                                                                                                                                                                                                                                     |

SCHOLARONE™  
Manuscripts

1  
2 **Mat Pilates and aquatic aerobic exercises for women with fibromyalgia. A protocol for a**  
3 **randomized controlled blind study**  
4

5  
6  
7 Caio Alano de Almeida Lins<sup>1</sup>, Thaiza Teixeira Xavier Nobre<sup>1</sup>, Vanessa Patrícia Soares de  
8 Sousa<sup>1</sup>, Renata Trajano Jorge Caldas<sup>2</sup>, Marcelo Cardoso de Souza<sup>1\*</sup>  
9

- 10  
11  
12  
13  
14 1- PT, PhD. Professor of Universidade Federal do Rio Grande do Norte, Faculdade de  
15 Ciências da Saúde do Trairi– (UFRN/FACISA), Santa Cruz, RN - Brazil.  
16  
17 2- PT, PhD. Professor of Faculdade Santa Terezinha (CEST), Curso de Fisioterapia. São  
18 Luís, MA - Brazil.  
19

20  
21  
22  
23 Email addresses for authors: [caiouzl@hotmail.com](mailto:caiouzl@hotmail.com); [thaizax@hotmail.com](mailto:thaizax@hotmail.com);  
24 [vanessafisio@gmail.com](mailto:vanessafisio@gmail.com); [renatatbjorge@gmail.com](mailto:renatatbjorge@gmail.com).  
25  
26

27  
28  
29  
30 \*Corresponding author:  
31

32  
33 Prof. Marcelo Cardoso de Souza, PT, PhD.  
34 Universidade Federal do Rio Grande do Norte, Faculdade de Ciências da Saúde do Trairi  
35 (UFRN/FACISA).  
36  
37 Master's Program of Collective Health FACISA/UFRN.  
38  
39 Vila Trairi st, S/N, Centro, Santa Cruz – RN, Brazil.  
40  
41 Zip code: 59200-000  
42  
43 Phone: +55 (84) 3291.2411  
44  
45 Email: [marcellogv@hotmail.com](mailto:marcellogv@hotmail.com)  
46

47 **Word count: 4.810**  
48  
49  
50  
51  
52  
53  
54  
55  
56  
57  
58  
59  
60

## Abstract

**Introduction:** Physical exercises have been recommended to improve overall well-being in patients with fibromyalgia, with the main objective to repair the effects of lack of physical conditioning and to improve symptoms, especially pain and fatigue. Although widely recommended and widely known, few studies support the use of the Pilates method as effective for improving the symptoms of the disease, comparing it with other well-founded exercise modalities. This protocol was developed to describe the design of a randomized controlled study with a blind evaluator that evaluates the effectiveness of the mat Pilates method in comparing it with aquatic aerobic exercises for improving pain in women with fibromyalgia.

**Methods:** Sixty (60) women aged 18 to 60 years with fibromyalgia diagnosis, a score of between 3 and 8 points on the visual analog scale for pain, and who sign the clear and informed consent form will be recruited according to the inclusion criteria. They will be randomized into one of the two intervention groups: (i) Pilates, to perform an exercise program based on the Mat Pilates method; and (ii) aquatic exercise, to participate in a program of aerobic exercises in the swimming pool. The protocol will correspond to 12 weeks of treatment, with both groups performing the exercises with supervision twice a week. The primary outcome will be pain (Visual Analogue Scale for pain). Secondary outcomes are to include impacts related to the disease, functional capacity, sleep quality and overall quality of life. The evaluations will be performed at three moments: baseline, after 6 weeks and 12 weeks of treatment.

**Discussion:** This is a pioneering study for evaluating the effectiveness of the Mat Pilates method in comparing it with aquatic aerobic exercises with a follow-up of 12 weeks, thus becoming a new contribution to fibromyalgia treatment. In addition, the implementation of the protocol in question may contribute to elucidate the effects of the Mat Pilates method in patients with fibromyalgia, as well as the frequency and adequate duration of exercise to improve symptoms.

**Trial registrations:** ClinicalTrials.gov Identifier (NCT03149198), May 11, 2017.

Approved by the Ethics Committee of FACISA/UFRN (Number: 2.116.314).

**Keywords:** Pain, therapeutic exercise, aerobic exercise, Pilates, fibromyalgia.

### Strengths and limitations of this study

- Few studies support the use of the pilates method as effective for improving the symptoms of the fibromyalgia.
- This protocol was developed to describe the design of a randomized controlled study with a blind evaluator that evaluates the effectiveness of the mat Pilates method in comparing it with aquatic aerobic exercises for improving pain in women with fibromyalgia.
- We hope that the conclusion of this study contributes to scientific knowledge, providing subsidies for the use of mat pilates as a safe and effective tool in treating FM patients, as well as to help elucidate the best frequency and the adequate duration of exercise for improving the symptoms.

### Background

Fibromyalgia (FM) is a syndrome characterized by chronic generalized pain and sleep disorder, fatigue, reduced muscle strength, depression, anxiety, irritable bowel, and other symptoms that cause impairment to quality of life<sup>1-3</sup>. The prevalence of FM in the general population ranges from 0.66 to 4.4%, varying according to the profile of patients evaluated and the study methodology. Most studies indicate that FM is more prevalent in women than in men, at a ratio of 8 to 1, especially in the age group between 35 and 60 years. Studies with adolescent children and special groups are scarce and few are conclusive. A study carried out in Brazil

1 confirms that fibromyalgia was the second most frequent rheumatic disease in outpatient clinics,  
2  
3 only after osteoarthritis<sup>4</sup>.  
4  
5

6 The causes for the onset of this syndrome have not yet been fully elucidated. However,  
7  
8 recent scientific research suggests that changes in the metabolism and regulation of certain  
9  
10 substances of the central nervous system such as serotonin and noradrenaline can trigger the  
11  
12 disease<sup>5</sup>.  
13  
14

15 With a controversial etiopathogenesis, the cause of FM is associated with genetic,  
16  
17 environmental and neuromodulatory factors<sup>6</sup>. Many patients with fibromyalgia have high levels  
18  
19 of stress and feelings of depression, anxiety and frustration<sup>7</sup>. Patients feel fatigue and physical  
20  
21 tiredness with a loss of energy, and decreased strength when performing physical exercises. This  
22  
23 fatigue causes a great decrease in quality of life and often prevents performing activities of daily  
24  
25 living, thereby reducing productivity in the work environment.  
26  
27

28 Therefore, physical exercises have been recommended to improve the overall well-being  
29  
30 in patients with fibromyalgia, with the main purpose of repairing the effects of a lack of physical  
31  
32 conditioning and improving the symptoms, especially pain and fatigue. Valim et al. (2013) report  
33  
34 that physical exercises in fibromyalgia are beneficial, low-cost and promote improvement in pain  
35  
36 and other symptoms of the disease<sup>8</sup>.  
37  
38

39 The importance of physical exercise for patients with FM is already well described in the  
40  
41 literature, in addition to it being a low-cost, safe and efficient intervention as a form of treatment.  
42  
43 Exercises have also been shown to be effective in reducing pain and the number of painful  
44  
45 points, improving quality of life, mood and other psychological aspects. Although studies show  
46  
47 benefits in almost all exercise modalities, further evidence supports the practice of aerobic  
48  
49 training<sup>9,10</sup>. Within this perspective, a Cochrane review on aquatic exercises for fibromyalgia  
50  
51 showed that aquatic exercises are effective in improving physical well-being, functional  
52  
53 capacity, pain, a 37% improvement in muscular strength and improvement in cardiovascular  
54  
55 capacity<sup>11</sup>.  
56  
57  
58  
59  
60

1  
2 For some while the Pilates method of exercising has been gaining popularity, being  
3 considered one more exercise modality that can be used. This method consists of a system of  
4 stretching and strengthening exercises developed by Joseph H. Pilates almost 90 years ago,  
5  
6 which employs controlled and precise sets of movements and the use of special equipment.  
7  
8 Exercises can also be performed in different positions on the ground on a mat, avoiding  
9  
10 excessive impact or pressure on muscles, joints and tissues. The purpose of physical training  
11 using the Pilates method is to achieve better functioning of the body based on strengthening the  
12 core, a term that refers to the center of the trunk that supports the body. The second major feature  
13 of the method are the six basic principles: centralization, concentration, control, precision,  
14 breathing, and flow<sup>12</sup>.

15  
16 Although highly recommended and widely known, few studies support the use of Pilates  
17 in fibromyalgia. Few studies have evaluated the effects of the method for the treatment of FM  
18 patients. In addition, these studies present several methodological flaws that compromise their  
19 results and suggest that studies with better methodological design should be conducted with the  
20 objective of observing the effectiveness of the Pilates method in treating these patients<sup>13,14</sup>.  
21  
22 Therefore, the main objective of this study is to evaluate the effectiveness of the Mat Pilates  
23 method in improving pain in women with fibromyalgia, and comparing it with aquatic aerobic  
24 exercises. Our hypothesis is that the Mat Pilates method can also bring benefits for improving  
25 pain in FM patients, similar to aquatic aerobic exercises.

## 26 **Methods**

### 27 **Design**

28 Study protocol for a randomized controlled parallel group single-blind trial. This study  
29 has been registered (ClinicalTrials.gov Identifier: NCT03149198). Participants will be  
30 randomized to perform mat Pilates or aerobic exercises. Allocation to either group (Pilates or  
31 aerobic exercises) will be achieved through a computer-generated sequence of random numbers.

1  
2 The allocation sequence will be created and carried out by a non-interventionist researcher in  
3  
4 charge of telephone screening and handling the data obtained in the various assessment sessions.  
5

6 Figure 1 shows a flowchart of the progress of the various stages of this test. This study  
7  
8 was approved by the Ethics Committee of Federal University of Rio Grande do Norte, Faculty of  
9  
10 Health Sciences of Trairi – (FACISA/UFRN) (Number: 2.116.314).  
11

12  
13 **Figure 1.**  
14  
15  
16  
17  
18  
19  
20  
21  
22  
23  
24  
25  
26  
27  
28  
29  
30  
31  
32  
33  
34  
35  
36  
37  
38  
39  
40  
41  
42  
43  
44  
45  
46  
47  
48  
49  
50  
51  
52  
53  
54  
55  
56  
57  
58  
59  
60



## Participants

Sixty (60) women aged 18 to 60 years, with a clinical diagnosis of fibromyalgia according to the criteria of the American College of Rheumatology<sup>15</sup> and scoring between 3 and 8 points on the visual analogue pain scale (VAS) will be recruited, provided they give their consent after being informed of the study's objectives and procedures. The volunteers will be recruited from the waiting list of patients of the Physiotherapy School Clinic of FACISA/UFRN; in addition, the project will also be announced by radio and local media. After this, a telephone contact will first be made to clarify any questions from the participants, and the first screening for inclusion will be carried out.

Personal data of the participants will be numerically coded and stored in a database, which can only be accessed by the researcher responsible for the randomization and blinding process. Informed consent as well as all study information will be passed on to all participants. Prior to any data collection, participants must sign the clear and informed consent form.

### Inclusion criteria:

- Women diagnosed with fibromyalgia according to the American College of Rheumatology classification criteria.
- Aged between 18 and 60 years.
- Reporting pain between 3 and 8 on the VAS.

### Exclusion Criteria:

- uncontrolled hypertension
- decompensated cardiorespiratory disease
- history of syncopes or arrhythmias induced by physical exercise
- decompensated diabetes
- serious psychiatric illness

- 1 - history of regular exercise (at least 2 times a week) in the last 6 months
- 2
- 3
- 4 - any other condition that makes it impossible for the patient to perform physical exercises.
- 5
- 6
- 7

#### 8 Research team

9  
10 This study will involve 5 researchers; 1 researcher responsible for the evaluations; 2  
11 researchers responsible for the interventions (1 for each group); 1 researcher responsible for the  
12 interview, initial screening and randomization of participants, and 1 researcher who will perform  
13 the statistical analysis.  
14  
15  
16  
17  
18

#### 19 Randomization and blinding

20  
21  
22 Participants who are successfully approved for screening and who agree to sign the free  
23 and informed consent form will receive a number in a randomization table according to the  
24 inclusion order in the study. These numbers will correspond to the Pilates group or aquatic  
25 exercise group in which volunteers will be included. This distribution will be performed  
26 randomly through the website *randomization.com*. The allocation will be concealed using sealed  
27 and opaque envelopes, numbered consecutively. An independent researcher who will not  
28 participate in the other study procedures will perform the randomization process. The flow  
29 diagram of the study is summarised in Fig. 1.  
30  
31  
32  
33  
34  
35  
36  
37  
38  
39  
40  
41  
42

43 The researchers responsible for interventions will be blinded to the participants' initial  
44 assessments, and the researcher responsible for evaluations will not know the group of each  
45 participant.  
46  
47  
48

49 In addition, data collected during participant evaluations will not be revealed to the  
50 researchers responsible for interventions, and participants will be instructed not to disclose their  
51 experience and information related to the intervention.  
52  
53  
54  
55  
56  
57  
58  
59  
60

1  
2 Finally, the researcher responsible for statistical analysis will be blinded. Once the  
3  
4 intervention is completed, he/she will receive an Excel data table with all necessary data without  
5  
6 identification of the subjects or the groups.  
7  
8  
9

## 10 Interventions

11  
12 Participants in this study will receive 24 treatment sessions (two per week) for 12 weeks.  
13  
14 Evaluations will be performed prior to the start of treatment, after 12 sessions and after 24  
15  
16 treatment sessions.  
17  
18

### 19 Mat Pilates Exercise Program

20  
21 The exercise program based on the Pilates method will be carried out on a mat, in the  
22  
23 Group Room of the Clinic School of Physiotherapy of the *FACISA/UFRN* in Santa Cruz, RN,  
24  
25 Brazil. The room has ample space and air conditioning for better patient accommodation. The  
26  
27 exercises will be performed twice a week for 12 weeks. Each session will last about 50 minutes  
28  
29 and will be supervised by an experienced Mat Pilates researcher who will be responsible for the  
30  
31 intervention in this group. A total of 10 exercises will be performed, which are presented in  
32  
33 Table 1. Chart 1 shows the progression of the exercises according to the time.  
34  
35  
36  
37  
38

39 Chart 1: Exercise progression according to the intervention time

| 41 Period                                                     | 42 Dose                     |
|---------------------------------------------------------------|-----------------------------|
| 43 First month (1 <sup>st</sup> to 8 <sup>th</sup> session)   | 44 1 set of 8 repetitions   |
| 45 Second month (8 <sup>th</sup> to 16 <sup>th</sup> session) | 46 2 sets of 10 repetitions |
| 47 Third month (16 <sup>th</sup> to 24 <sup>th</sup> session) | 48 3 sets of 8 repetitions  |

49 Intervention group exercise program  
50  
51  
52  
53  
54

55 Table 1: Mat Pilates Group Exercise Program  
56  
57  
58  
59  
60

| <u>NAME OF THE EXERCISE</u>                                                                                                                                                       | <u>DESCRIPTION</u>                                                                                                                                                                                                                                                                                                                         |
|-----------------------------------------------------------------------------------------------------------------------------------------------------------------------------------|--------------------------------------------------------------------------------------------------------------------------------------------------------------------------------------------------------------------------------------------------------------------------------------------------------------------------------------------|
| <p>1 - SWAN</p> <p>Stretches the anterior trunk chain.</p> <p>Strengthens pectoral, triceps and anterior deltoid muscles.</p>                                                     | <p>1 – Lying in the prone position, hands resting in the direction of the shoulders.</p> <p>2 – Extend the elbows, keeping head aligned with spine, extending/stretching the trunk.</p> <p>3 – Return to the initial position.</p>                                                                                                         |
| <p>2 – ONE LEG UP-DOWN</p> <p>Strengthens the rectus femoris, iliopsoas and sartorius muscles.</p>                                                                                | <p>1 – Lying in the supine position, arms outstretched alongside the body.</p> <p>2 – Raise leg in extension with feet in plantar flexion.</p> <p>3 – Return to the initial position.</p>                                                                                                                                                  |
| <p>3 – LEG CIRCLES</p> <p>Strengthens the rectus femoris, sartorius, adductor, gluteus medius muscles.</p>                                                                        | <p>1 – Lying in the supine position, arms outstretched alongside the body and supported on the ground.</p> <p>2 – Raise leg in extension, with feet in plantar flexion.</p> <p>3 – Make circles with the leg.</p>                                                                                                                          |
| <p>4 – SINGLE LEG STRETCH</p> <p>Strengthens the abdomen, stretches the glutes and the lumbar spine.</p>                                                                          | <p>1 – Lying in the supine position, flex the right leg by placing the left hand on the right knee and the right hand on the right ankle, flexing as much as possible toward the chest. The left leg will be extended at an angle of 30°.</p> <p>2 – Slowly switch the leg.</p>                                                            |
| <p>5 – SAW</p> <p>Stretches trunk rotators, the hamstrings and the quadratus lumborum muscle.</p> <p>Strengthens the rectus abdominis, external and internal oblique muscles.</p> | <p>1 – Sitting with the back straight and legs apart at hip width, arms extended and apart at shoulder height.</p> <p>2 – Slowly from the waist, twist the spine to the left.</p> <p>3 – Move the right arm toward the left foot and the left arm back at shoulder height.</p> <p>4 – Return to the initial position and switch sides.</p> |
| <p>6 – SIDE KICKS: FRONT AND BACK</p> <p>Strengthens the rectus femoris, iliopsoas, sartorius, gluteus medius, gluteus maximus and abdominal muscles in isometry.</p>             | <p>1 – Lying straight in lateral decubitus, arm flexed and hand resting under the head.</p> <p>2 – Keep your upper leg aligned with your hips and slowly bring the extended leg forward.</p> <p>3 – Return to the initial position.</p>                                                                                                    |

|                                                                                                                                                                                                        |                                                                                                                                                                                                                                                                                             |
|--------------------------------------------------------------------------------------------------------------------------------------------------------------------------------------------------------|---------------------------------------------------------------------------------------------------------------------------------------------------------------------------------------------------------------------------------------------------------------------------------------------|
| <p>7 – THE HUNDRED</p> <p>Strengthens the abdominal, oblique, transverse and rectus femoris muscles.</p>                                                                                               | <p>1 – Lying in the supine position, elbow extended with the shoulder, hips and knees at 90°.</p> <p>2 – Knee extension at approximately 45°. Slight bending of the trunk (removing the shoulder blades from the mat) and chin toward chest.</p> <p>3 – Return to the initial position.</p> |
| <p>8 – PELVIC LIFT ON THE BALL</p> <p>Strengthens the gluteus maximus, biceps femoris, semitendinosus, semimembranosus, gastrocnemius, and quadriceps femoris muscles.</p> <p>Mobilizes the spine.</p> | <p>1 – Lying in the supine position, legs flexed at 90°, with heels on the ball.</p> <p>2 - Raise the hips from the mat, extending the legs.</p> <p>3 – Return to the initial position.</p>                                                                                                 |
| <p>9 – SIT-UPS ON THE BALL</p> <p>Strengthens rectus abdominis and external oblique muscles.</p>                                                                                                       | <p>1 – Lying in the supine position holding the ball over the head and legs at a 45°.</p> <p>2 – Bring the ball toward the legs and hold it.</p> <p>3 – Return to the initial position.</p>                                                                                                 |
| <p>10 – STRETCHING ON THE BALL</p> <p>Stretching and muscle relaxation.</p>                                                                                                                            | <p>1 – Lying in lateral, ventral and dorsal decubitus on the ball.</p>                                                                                                                                                                                                                      |

### Aquatic Aerobic Exercise Program

The aerobic exercise program will be carried out at the therapeutic swimming pool of the Physiotherapy School Clinic at the *FACISA/UFRN* in Santa Cruz, RN. The pool is heated (30°C), which provides better effects to the proposed treatment.

The exercises will be performed twice a week for 12 weeks. Each session will last about 50 minutes and will be supervised by an experienced researcher responsible for the intervention in this group.

Patients will always be instructed to perform the exercise according to their current conditioning and increase the intensity according to their perception of exertion (Borg scale). The program is best described in Table 2.

Table 2: Aquatic aerobic exercises group exercise program.

| <u>TIME</u>                         | <u>EXERCISE</u>                                                                                                                                                                                                                                                                                                                                                                    |
|-------------------------------------|------------------------------------------------------------------------------------------------------------------------------------------------------------------------------------------------------------------------------------------------------------------------------------------------------------------------------------------------------------------------------------|
| 5 min – Warm-up.                    | 1 - Walking in a clockwise circle at a slow pace.<br>2 - Walking in a counterclockwise circle at a slow pace.<br>3 - Walking with abduction/adduction in the horizontal plane of the upper limbs at a fast pace.<br>4 - Walking with knee flexion and alternating hip flexion and hand on opposite knee at a fast pace.                                                            |
| 30 min – Aquatic aerobic exercises. | 1 - Rapid tiptoe walking (2 laps in the pool)<br>2 - Fast walking on the heels (2 laps in the pool).<br>3 - Quick lateral marching (2 laps in the pool).<br>4 - Circles against the turbulent water flow.<br>5 - Rhythmic waist circles using pool noodles and floaters.<br>6 - Rhythmic movement of upper and lower limbs.                                                        |
| 5 min – Cool-down.                  | 1 - Walking in a clockwise circle at a slow pace.<br>2 - Walking in a counterclockwise circle at a slow pace.<br>3 - Walking with abduction/adduction in the horizontal plane of the upper limbs at a slow pace.<br>4 - Walking with knee flexion and alternating hip flexion and hand on the opposite knee at a slow pace.<br>5 - Respiratory exercises of diaphragmatic pattern. |

### Evaluations

During the baseline measurement, the following descriptive characteristics will be collected: gender, age, weight, height, current occupation. The chronology of the evaluation of the primary and secondary outcome measures is shown in Table 3.

### Primary outcome measures

1  
2 The Visual Analogue Scale for pain is the main result of this study and will be used for  
3  
4 the intensity of pain. Participants will mark the intensity of their pain on the VAS consisting of a  
5  
6 100-mm long horizontal line, which is anchored by the classifications of “no pain” at the left end  
7  
8 (score 0) and “worst pain imaginable” rightmost (score 10), asking the participant for the most  
9  
10 intense pain episode perceived while doing daily activities. The VAS has demonstrated the  
11  
12 ability to detect changes in pain, establishing a minimal clinically significant difference at 2.5  
13  
14 cm<sup>16</sup>.

#### 15 16 17 18 19 Secondary outcome measures 20

- 21  
22  
23  
24 1. Impact related to the disease: the evaluation will be performed using the FIQ  
25  
26 (*Fibromyalgia Impact Questionnaire*), a questionnaire that assesses anxiety, depression  
27  
28 and physical performance in fibromyalgia. The translated version adapted for the  
29  
30 Brazilian population will be used<sup>17</sup>.
- 31  
32 2. Functional capacity:
- 33  
34 • “*Timed Up and Go test*” (TUG), a functional test consisting of getting up from a  
35  
36 chair without the aid of the arms, walking a distance of three meters, turning around  
37  
38 and walking back. At the start of the test, the patient should have his or her back  
39  
40 resting on the back of the chair. The patient then receives the “go” command to  
41  
42 perform the test and they are timed from the command voice until the moment they  
43  
44 rest their back on the chair again<sup>18,19</sup>.
  - 45  
46 • *Six-minute Walk Test* (6MWT), although this test was developed to evaluate the  
47  
48 physical capacity of patients with cardiopulmonary diseases, it has also been used  
49  
50 (with some adaptations) to measure the walking performance of patients with motor  
51  
52 difficulties. The test will be performed on a 20-meter marked gymnasium track away  
53  
54 from other people. The patients will be instructed to walk the entire distance, being  
55  
56  
57  
58  
59  
60

1  
2 able to interrupt the test if they do not feel able to continue<sup>19</sup>.  
3

4 3. Assessment of sleep quality:  
5

- 6
- 7 • *Pittsburgh Sleep Quality Index* – the Brazilian Portuguese version (PSQI-BR) will be  
8 used to evaluate the subjective quality of sleep. This questionnaire consists of  
9 nineteen items grouped into seven components, which are scored on a scale from 0 to  
10 3. The components are: (1) subjective quality of sleep; (2) sleep latency; (3) duration  
11 of sleep; (4) habitual sleep efficiency; (5) sleep disorders; (6) use of medication for  
12 sleep; and (7) daytime dysfunction. The values corresponding to respondents'  
13 responses for each component are summed up to give an overall PSQI score, which  
14 ranges from 0 to 21. Scores between 0-4 indicate good sleep quality, while 5-10  
15 scores indicate poor quality, and above 10 indicate sleep disturbance<sup>20</sup>.  
16

- 17 • *Epworth Sleepiness Scale* version in Brazilian Portuguese (ESS-BR) will be used to  
18 measure the possibility of dozing off. The questionnaire consists of eight daily  
19 situations where the probability of dozing off is graded on a scale from zero (no  
20 probability of dozing off) to three (very likely to doze off). At the end, the scores are  
21 summed up to generate a total score ranging from 0-24, where an individual above 10  
22 points is characterized with excessive drowsiness<sup>21</sup>.  
23

- 24
- 25
- 26
- 27
- 28
- 29
- 30
- 31
- 32
- 33
- 34
- 35
- 36
- 37
- 38
- 39 4. Overall quality of life: will be assessed by the *Short Form-36 Health Survey*, a quality of  
40 life questionnaire, translated into Portuguese, containing 36 questions. The result is given  
41 in 8 domains: functional capacity, limitation by physical aspects, pain, general health  
42 status, vitality, social aspects, mental health and emotional aspects, with scores ranging  
43 from 0-100 in each domain, in which 100 is the best health state and 0 the worst health  
44 state<sup>22</sup>.  
45  
46  
47  
48  
49  
50



Table 3 Chronology of primary and secondary outcome measures

| Results          | Baseline | 6 week | 12 week |
|------------------|----------|--------|---------|
| <i>Primary</i>   |          |        |         |
| VAS              | ✓        | ✓      | ✓       |
| <i>Secondary</i> |          |        |         |
| FIQ              | ✓        | ✓      | ✓       |
| TUG              | ✓        | ✓      | ✓       |
| 6MWT             | ✓        | ✓      | ✓       |
| PSQI-BR          | ✓        | ✓      | ✓       |
| ESS-BR           | ✓        | ✓      | ✓       |
| SF-36            | ✓        | ✓      | ✓       |

VAS= *Visual Analogue Scale* for pain, FIQ= *Fibromyalgia Impact Questionnaire*, TUG= *Timed Up and Go test*, 6MWT= *Six-minute Walk Test*, PSQI-BR= *Pittsburgh Sleep Quality Index* – the Brazilian Portuguese version, ESS-BR= *Epworth Sleepiness Scale* version in Brazilian Portuguese, SF-36= *Short Form-36 Health Survey*.

### Training of researchers

A series of training stages prior to starting the study will be implemented for the assessment and treatment intending to protocolize the actions carried out in the study. In these training stages, treatment techniques and measuring will be practiced in order to reach a consensus among the involved researchers.

### Statistical issues

#### *Sample size calculation*

The sample size was calculated based on the pain variable in order to find a difference of  $\pm 2.5$  points between the intervention groups on the visual analog pain scale - VAS [16], with a standard deviation of 2.5 points<sup>23</sup>. A sample of 60 participants is required (30 in each group) in order to achieve a statistical power of 90% with a 5% alpha, and considering a loss rate of 20%.

1  
2 The sample calculation was performed for the ANOVA repeated measures statistical test with  
3  
4 interaction between groups. Gpower3.1 software was used for the calculation.  
5  
6  
7

### 8 *Statistical analysis*

10 The analysis will be descriptive for all outcomes included in the study, expressing  
11  
12 quantitative outcomes with their mean  $\pm$  standard deviation and qualitative outcomes with their  
13  
14 absolute value, percentage and 95% confidence intervals.  
15  
16

17 Data will be analyzed by SPSS software. The chi-square test will be used to observe  
18  
19 associations between the qualitative variables. After observing the normal distribution and  
20  
21 homogeneity of the variances of the quantitative variables by means of the kolmogorov-Smirnov  
22  
23 test and the Levene test, respectively, the Student's t-test (for variables with normal distribution)  
24  
25 or the Mann-Whitney test (for variables with a non-normal distribution) will be used to perform  
26  
27 a comparison of the means. Estimates of average effect (differences between groups) for all  
28  
29 variables will be calculated using the ANOVA mixed model. This analysis model incorporated  
30  
31 the intervention groups (Pilates and aquatic exercise), time (baseline, 6 weeks and 12 weeks) and  
32  
33 the group  $\times$  time interaction. When a significant F value is found, the Bonferroni post-hoc test  
34  
35 will be applied in order to identify the differences. An intention-to-treat analysis will be used to  
36  
37 assess the response to intervention, with the last evaluation carried forward when necessary. The  
38  
39 size of the effect between the groups for the variables that present intergroup differences can be  
40  
41 calculated at some point, with a respective 95% confidence interval. The level of statistical  
42  
43 significance adopted will be 5%. The analysis will be performed by an independent researcher.  
44  
45  
46  
47  
48  
49

### 50 **Discussion**

51  
52 This protocol will be carried out for a randomized single-blind clinical trial, in order to  
53  
54 investigate whether mat Pilates produces similar beneficial effects to aquatic aerobic exercises in  
55  
56 reducing pain and disability in woman with fibromyalgia. With the conclusion of the study, we  
57  
58  
59

1  
2 hope to test the following null hypothesis: “There is no difference in pain and disability for  
3 participants undergoing treatment with Pilates or with aquatic aerobic exercises”.

4  
5  
6 Patients with FM experience fatigue<sup>24</sup> and physical tiredness, with loss of energy, and  
7 decreased power/strength when performing physical exercises. Fatigue leads to a great decrease  
8 in quality of life and often prevents performance of activities of daily living, thereby reducing  
9 productivity in the workplace. Thus, physical exercises, and especially aerobic ones<sup>25</sup>, have been  
10 recommended to improve overall well-being in patients with fibromyalgia, with the main  
11 purpose of repairing the effects of a lack of physical conditioning, and especially improving  
12 symptoms regarding pain and fatigue.  
13  
14  
15  
16  
17  
18  
19  
20

21 A recent Cochrane review on aerobic exercise in fibromyalgia concluded that, when  
22 compared to control, moderate quality evidence indicates that aerobic exercise is likely to  
23 improve quality of life, and poor quality evidence suggests that aerobic exercise may slightly  
24 decrease pain intensity, slightly improve physical function, and lead to a slight difference in  
25 fatigue and stiffness<sup>26</sup>.  
26  
27  
28  
29  
30  
31

32 Regarding aquatic aerobic exercises, a meta-analysis<sup>27</sup> found good results for aquatic  
33 therapy (hydrotherapy) with a duration of over 20 weeks; however, in our study we will use  
34 aquatic exercises with an aerobic purpose, rather than just aquatic physiotherapy. *Deep water*  
35 *running* is an aquatic aerobic conditioning technique that has shown to be as beneficial as  
36 aerobic exercise on land, however with advantages related to emotional aspects in patients with  
37 fibromyalgia<sup>28</sup>. A systematic review carried out by Bidonde et al. (2014) concluded that the  
38 evidence of low to moderate quality in relation to the control suggests that aquatic training is  
39 beneficial for improving well-being, symptoms and fitness in adults with fibromyalgia. Low  
40 quality evidence suggests that there are benefits of aquatic and land exercise, except for muscle  
41 strength (low quality evidence favoring land exercises) and also that no serious adverse effects  
42 were found<sup>11</sup>.  
43  
44  
45  
46  
47  
48  
49  
50  
51  
52  
53  
54  
55  
56  
57  
58  
59  
60

1  
2 A recent protocol on aquatic exercise *versus* land exercises to treat balance and pain in  
3 women with fibromyalgia was published, showing the interest of the researchers in deepening  
4 knowledge on the subject, since more well-designed studies are still necessary. However, our  
5 aquatic aerobic exercise program differs from the one used in this study due to the fact that it has  
6 the objective of working on more aspects related to balance and proprioception in water<sup>29</sup>. The  
7 Pilates method is currently well known and highly recommended by doctors and health  
8 professionals with the aim of improving pain, posture, stretching and strengthening of the body  
9 as a whole. Patients with fibromyalgia are frequently recommended to perform physical  
10 exercises to improve the fibromyalgia symptoms, in which Pilates represents an important option  
11 to be considered. However, few studies have evaluated the effects of the method for the  
12 treatment of FM patients. In addition, these studies present several methodological flaws that  
13 compromise their results, suggesting that studies with better methodological design should be  
14 conducted with the objective of observing the effectiveness of the Pilates method in treating  
15 these patients<sup>13,14</sup>.

16  
17 Adherence to treatment is something very important to be reported, mainly in  
18 interventions for chronic musculoskeletal disorders<sup>30</sup>. We hope that the volunteers in our study  
19 will have good adherence to treatment, considering that the heated pool is a stimulating  
20 invitation for relaxation and that Pilates is a popular, famous and still relatively high-cost  
21 technique in our reality, thus we believe that our intervention will be well accepted.

22  
23 In view of the above, we hope that the conclusion of this study contributes to scientific  
24 knowledge, providing subsidies for the use of mat pilates as a safe and effective tool in treating  
25 FM patients, as well as to help elucidate the best frequency and the adequate duration of exercise  
26 for improving the symptoms.

## 27 28 29 30 31 32 33 34 35 36 37 38 39 40 41 42 43 44 45 46 47 48 49 50 51 52 53 54 **Abbreviations** 55 56 57 58 59 60

1  
2 FM: fibromyalgia; FACISA/UFRN: Federal University of Rio Grande do Norte, Faculty of  
3  
4 Health Sciences of Trairi; VAS: Visual Analogue Scale; FIQ: Fibromyalgia Impact  
5  
6 Questionnaire; TUG: Timed Up and Go test; 6MWT: Six-minute Walk Test; PSQI-BR:  
7  
8 Pittsburgh Sleep Quality Index – the Brazilian Portuguese version; ESS-BR: Epworth Sleepiness  
9  
10 Scale version in Brazilian Portuguese; SF-36: Short Form-36 Health Survey.  
11  
12  
13  
14

### 15 **Acknowledgements**

16  
17 The authors are grateful to FACISA/UFRN and the research director (PROPESQ/UFRN) for the  
18  
19 support given to the research.  
20  
21  
22  
23

### 24 **Funding**

25  
26 Not applicable.  
27  
28  
29

### 30 **Availability of data and material**

31  
32 Not applicable.  
33  
34  
35  
36

### 37 **Authors' contributions**

38  
39 CAAL and MCS lead the study design and design and planned the statistical analysis. TTXN,  
40  
41 VPSS and RTJC have made substantial contributions to the design and design of the study.  
42  
43 CAAL, MCS, TTXN, VPSS and RTJC reviewed the manuscript critically and gave final  
44  
45 approval for publication.  
46  
47  
48  
49

### 50 **Competing interests**

51  
52 The authors declare that they have no competing interests.  
53  
54  
55

### 56 **Consent for publication**

1  
2 Not applicable.  
3  
4  
5

### 6 **Ethics approval and consent to participate**

7  
8 This study was approved by the Ethics Committee of Federal University of Rio Grande do Norte,  
9 Faculty of Health Sciences of Trairi – (FACISA/UFRN) with registration code 2.116.314. The  
10 ethical principles agreed in the Declaration of Helsinki will be respected for all study procedures.  
11  
12 Respect for individuals will be insured and their autonomy will be maintained. Participants will  
13 be informed of the study objectives, its risks and benefits. Participants will be free to abandon  
14 the study at any time without the obligation of giving any explanation. Participants must sign the  
15 informed consent before the study begins. This study protocol is registered in ClinicalTrials.gov  
16 (a U.S. National Institutes of Health service) with the identifier NCT03149198, published on  
17  
18 11th May, 2017.  
19  
20  
21  
22  
23  
24  
25  
26  
27

28 **Figure Legend: Fig. 1** Flow diagram of the study  
29  
30

### 31 **References**

- 32  
33  
34  
35  
36 1. Gowans SE, Dehuek A, Voss S, Silaj A, Abbey SE. Six- Month and One-Year Followup of 23  
37 Weeks of Aerobic Exercise for Individuals With Fibromyalgia. *Arthritis Rheum.* 2004;51:890-8.  
38  
39  
40  
41  
42 2. Figueroa A, Kingsley JD, McMillan V, Pantou LB. Resistance Exercise Training Improves  
43 Heart Rate Variability in Women With Fibromyalgia. *Clin Physiol Funct Imaging.* 2008;28:49-  
44 54.  
45  
46  
47  
48  
49 3. de Oliveira FS, de Almeida Silva HJ, de Pontes Oliveira JM, da Silva JFC, Silva Gomes VL,  
50 Fonseca DS, et al. The sophrology as adjuvant therapy may improve the functionality of patients  
51 with fibromyalgia. A pilot randomized controlled trial. *MTP&RehabJournal.* 2016;14:386.  
52  
53  
54  
55  
56  
57 4. Heymann ER, Paiva ES, Junior MH, Polak DF, Martinez JE, Proveza JR, et al. Consenso  
58  
59  
60

- 1  
2 brasileiro do tratamento da fibromialgia. *Rev bras de reumatol.* 2010;50(1):56-66.  
3  
4  
5  
6  
7 5. Hoffman DL, Dukes EM. The health status burden of people with fibromyalgia: a review of  
8 studies that assessed health status with the SF-36 or the SF-12. *Int J Clin Pract.* 2008;62(1):115-  
9 26.  
10  
11  
12  
13  
14  
15  
16 6. Talotta R, Bazzichi L, Di Franco M, Casale R, Batticciotto A, Gerardi MC, et al. One year in  
17 review 2017: fibromyalgia. *Clin Exp Rheumatol.* 2017;;35 Suppl 105(3):6-12. Epub 2017 Jun  
18 28.  
19  
20  
21  
22  
23 7. Hadlandsmyth K, Dailey DL, Rakel BA, Zimmerman MB, Vance CG, Merriwether EN, et al.  
24 Somatic symptom presentations in women with fibromyalgia are differentially associated with  
25 elevated depression and anxiety. *J Health Psychol.* 2017 Oct 1:1359105317736577. doi:  
26 10.1177/1359105317736577. [Epub ahead of print]  
27  
28  
29  
30  
31  
32 8. Valim V, Natour J, Xiao Y, Pereira AF, Lopes BB, Pollak DF, et al . Effects of physical  
33 exercise on serum levels of serotonin and its metabolite in fibromyalgia: a randomized pilot  
34 study. *Rev Bras Reumatol.* 2013;53 (6):538-41.  
35  
36  
37  
38  
39  
40  
41 9. Busch AJ, Barber KAR, Overend TJ, Peloso PMJ, Schachter CL. Exercise for treating  
42 fibromyalgia syndrome. *Cochrane Database of Systematic Reviews* 2007, Issue 3.  
43  
44  
45  
46 10. Carville SF, Arendt-Nielsen S, Bliddal H, Blotman F, Branco JC, Buskila D et al. EULAR  
47 evidence-based recommendations for the management of fibromyalgia syndrome. *Ann Rheum*  
48 *Dis* 2008; 67:536-41.  
49  
50  
51  
52  
53  
54 11. Bidonde J, Busch AJ, Webber SC, Schachter CL, Danyliw A, Overend TJ, et al. Aquatic  
55 exercise training for fibromyalgia. *Cochrane Database Syst Rev.* 2014 Oct 28;(10):CD011336.  
56  
57  
58  
59  
60

1  
2 doi: 10.1002/14651858.CD011336.  
3  
4  
5

6 12. Natour J, Cazotti Lde A, Ribeiro LH, Baptista AS, Jones A. Pilates improves pain, function  
7 and quality of life in patients with chronic low back pain: a randomized controlled trial. Clin  
8 Rehabil. 2015;29(1):59-68.  
9  
10

11  
12  
13 13. Altan L, Korkmaz N, Bingol U, Gunay B. Effect of pilates training on people with  
14 fibromyalgia syndrome: a pilot study. Arch Phys Med Rehabil. 2009;90(12):1983-8.  
15  
16

17  
18  
19 14. Ekici G, Unal E, Akbayrak T, Vardar-Yagli N, Yakut Y, Karabulut E. Effects of  
20 active/passive interventions on pain, anxiety, and quality of life in women with fibromyalgia:  
21 Randomized controlled pilot trial. Women Health. 2017;57(1):88-107.  
22  
23  
24  
25  
26  
27

28  
29  
30 15. Wolfe F, Smythe HA, Yunus MB, Bennett RM, Bombardier C, Goldenberg DL, et al. The  
31 American College of Rheumatology 1990 criteria for the classification of fibromyalgia. Arthritis  
32 Rheum. 1990; 33(2):160-72.  
33  
34  
35  
36

37  
38  
39 16. Farrar JT, Young Jr JP, LaMoreaux L, Werth JL, Poole RM. Clinical importance of changes  
40 in chronic pain intensity measured on an 11-point numerical pain rating scale. Pain.  
41 2001;94(2):149-58.  
42  
43  
44  
45

46 17. Marques AP; Santos AMB; Assumpção A; Matsutani LA; Lage LV; Pereira CAB. Validação  
47 da versão brasileira do fibromialgia impacto questionário (FIQ). Rev. Bras. Reumatol. 2006;46  
48 (1): 24-31.  
49  
50

51  
52 18. Podsiadlo D, Richardson S. The timed "Up & Go": a test of basic functional mobility for frail  
53 elderly persons. J Am Geriatr Soc. 1991;39(2):142-8.  
54  
55  
56  
57  
58  
59  
60



1  
2  
3  
4 19. Bennell K, Dobson F, Hinman R. Measures of physical performance assessments: Self-Paced  
5 Walk Test (SPWT), Stair Climb Test (SCT), Six-Minute Walk Test (6MWT), Chair Stand Test  
6  
7 (CST), Timed Up & Go (TUG), Sock Test, Lift and Carry Test (LCT), and Car Task. *Arthritis*  
8  
9 *Care Res (Hoboken)*. 2011 Nov;63 Suppl 11:S350-70.  
10

11  
12  
13  
14 20. Bertolazi AN, Fagondes SC, Hoff LS, Dartora EG, Miozzo IC, de Barba ME, et al.  
15  
16 Validation of the Brazilian Portuguese version of the Pittsburgh Sleep Quality Index. *Sleep Med*.  
17  
18 2011;12(1):70-5.  
19

20  
21 21. Bertolazi AN, Fagondes SC, Hoff LS, Pedro VD, Menna Barreto SS, Johns MW.  
22  
23 Portuguese-language version of the Epworth sleepiness scale: validation for use in Brazil. *J Bras*  
24  
25 *Pneumol*. 2009 Sep;35(9):877-83.  
26

27  
28  
29  
30 22. Ciconelli RM, Ferraz MB, Santos W, Meinão I, Quaresma MR. Brazilian-Portuguese version  
31  
32 of the SF-36 questionnaire: A reliable and valid quality of life outcome measure. *Rev. Bras.*  
33  
34 *Reumatol*. 1999; 39, 143–150.  
35

36  
37 23. Gustafsson M, Gaston-Johansson F. Pain intensity and health locus of control: a comparison  
38  
39 of patients with fibromyalgia syndrome and rheumatoid arthritis. *Patient Educ Couns*.  
40  
41 1996;29(2):179–88.  
42

43  
44 24. Morris S, Li Y, Smith JAM, Dube' S, Burbridge C, Symonds T. Multidimensional daily diary  
45  
46 of fatigue-fibromyalgia-17 items (MDF-fibro-17). part 1: development and content validity.  
47  
48 *BMC Musculoskelet Disord*. 2017;18(1):195.  
49

50  
51  
52 25. Brosseau L, Wells GA, Tugwell P, Egan M, Wilson KG, Dubouloz CJ, et al. Ottawa Panel  
53  
54 evidence-based clinical practice guidelines for aerobic fitness exercises in the management of  
55  
56 fibromyalgia: part 1. *Phys Ther*. 2008;88(7):857-71.  
57

1  
2  
3  
4  
5  
6  
7 26. Bidonde J, Busch AJ, Schachter CL, Overend TJ, Kim SY, Góes SM, et al. Aerobic exercise  
8 training for adults with fibromyalgia. *Cochrane Database Syst Rev*. 2017 Jun 21;6:CD012700.  
9 doi: 10.1002/14651858.CD012700.  
10  
11

12  
13  
14  
15  
16 27. Lima TB, Dias JM, Mazquin BF, da Silva CT, Noqueira RM, Marques AP, et al. The  
17 effectiveness of aquatic physical therapy in the treatment of fibromyalgia: a systematic review  
18 with meta-analysis. *Clin Rehabil*. 2013;27(10):892-908. doi: 10.1177/0269215513484772.  
19  
20  
21

22  
23  
24  
25 28. Assis MR, Silva LE, Alves AM, Pessanha AP, Valim V, Feldman D, et al. A randomized  
26 controlled trial of deep water running: clinical effectiveness of aquatic exercise to treat  
27 fibromyalgia. *Arthritis Rheum*. 2006 Feb 15;55(1):57-65.  
28  
29  
30

31  
32  
33  
34 29. Rivas Neira S, Pasqual Marques A, Pegito Pérez I, Fernández Cervantes R, Vivas Costa J.  
35 Effectiveness of Aquatic Therapy vs Land-based Therapy for Balance and Pain in Women with  
36 Fibromyalgia: a study protocol for a randomised controlled trial. *BMC Musculoskelet Disord*.  
37 2017;19;18(1):22.  
38  
39  
40  
41

42  
43  
44  
45 30. Sanz-Baños Y, Pastor-Mira MÁ, Lledó A, López-Roig S, Peñacoba C, Sánchez-Meca J. Do  
46 women with fibromyalgia adhere to walking for exercise programs to improve their health?  
47 Systematic review and meta-analysis. *Disabil Rehabil*. 2017;7:1-13.  
48  
49  
50  
51

1  
2  
3  
4  
5  
6  
7  
8  
9  
10  
11  
12  
13  
14  
15  
16  
17  
18  
19  
20  
21  
22  
23  
24  
25  
26  
27  
28  
29  
30  
31  
32  
33  
34  
35  
36  
37  
38  
39  
40  
41  
42  
43  
44  
45  
46  
47  
48  
49  
50  
51  
52  
53  
54  
55  
56  
57  
58  
59  
60

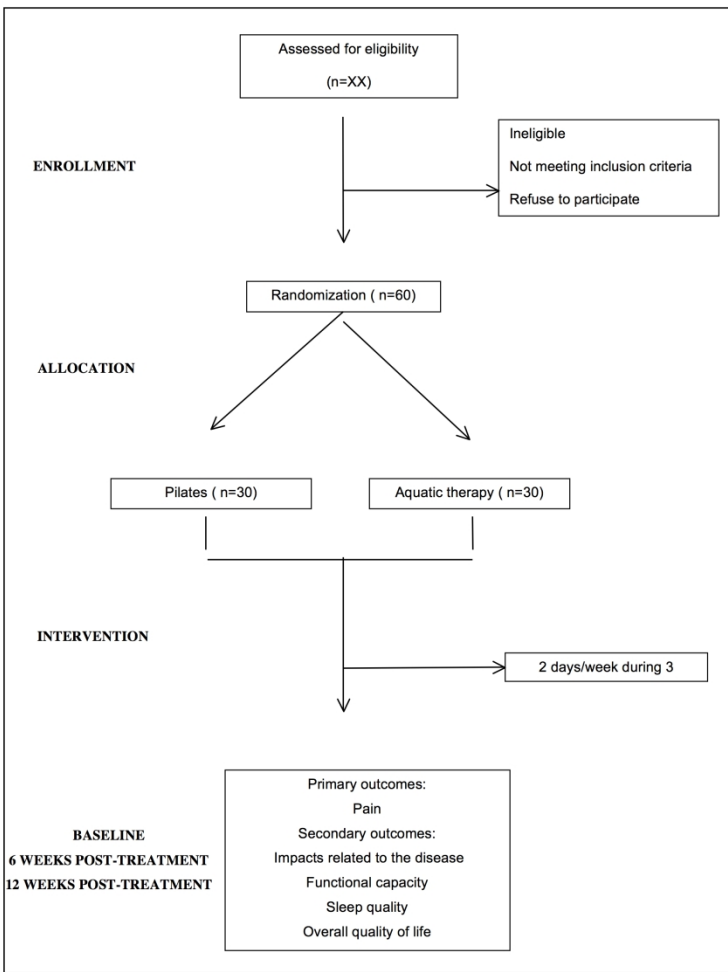

Fig. 1 Flow diagram of the study

Fig. 1 Flow diagram of the study

UFRN - FACULDADE DE  
CIÊNCIAS DA SAÚDE - FACISA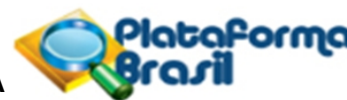**PARECER CONSUBSTANCIADO DO CEP****DADOS DO PROJETO DE PESQUISA**

**Título da Pesquisa:** Avaliação da efetividade do método pilates em solo no tratamento de mulheres com fibromialgia da cidade de Santa Cruz, RN. Um estudo controlado, randomizado e cego.

**Pesquisador:** Marcelo Cardoso de Souza

**Área Temática:**

**Versão:** 2

**CAAE:** 67834617.1.0000.5568

**Instituição Proponente:** Faculdade de Ciências da Saúde do Trairi

**Patrocinador Principal:** Financiamento Próprio

**DADOS DO PARECER**

**Número do Parecer:** 2.116.314

**Apresentação do Projeto:**

Exercícios físicos têm sido recomendados para melhorar o bem-estar global em pacientes com fibromialgia, com objetivo principal de reparar os efeitos da falta de condicionamento físico, e melhorar os sintomas especialmente a dor e a fadiga. Embora muito recomendado e amplamente conhecido, poucos são os estudos que suportam o uso do método pilates como efetivo na melhora dos sintomas da doença. Objetivo: Avaliar a efetividade do método pilates em solo na melhora da dor em mulheres com fibromialgia da cidade de Santa Cruz, RN. Metodologia: Este é um estudo controlado e randomizado, com avaliador cego, onde serão avaliadas 60 pacientes com diagnóstico de fibromialgia divididas em dois grupos. O grupo intervenção, realizará um programa de exercícios baseados no método pilates em solo e o outro, considerado grupo controle, participará de um programa de exercícios aeróbios na piscina. Ambos os grupos realizarão os programas de exercícios supervisionados 2 vezes por semana, por um período de 12 semanas. Os instrumentos de avaliação utilizados serão a EVA (escala visual de dor); questionário FIQ – Fibromyalgia Impact Questionnaire; a capacidade funcional pelo teste “Timed Up and Go” e teste de caminhada de 6 minutos; a qualidade de sono pelo Índice de Qualidade de Sono de Pittsburgh (PSQI-BR) e a ESS-BR (Escala de Sonolência de Epworth); por fim a qualidade de vida geral pelo SF-36.

**Endereço:** Rua Trairi S/N

**Bairro:** S/B

**CEP:** 59.200-000

**UF:** RN

**Município:** SANTA CRUZ

**Telefone:** (84)3291-2411

**E-mail:** cep@facisa.ufrn.br

# UFRN - FACULDADE DE CIÊNCIAS DA SAÚDE - FACISA



Continuação do Parecer: 2.116.314

## **Objetivo da Pesquisa:**

### **OBJETIVO GERAL**

Avaliar a efetividade do método pilates em solo na melhora da dor em mulheres com fibromialgia da cidade de Santa Cruz, RN.

### **OBJETIVOS ESPECÍFICOS**

Avaliar a efetividade do método pilates em solo na melhora da:

- capacidade funcional em mulheres com fibromialgia da cidade de Santa Cruz, RN.
- qualidade de vida em mulheres com fibromialgia da cidade de Santa Cruz, RN.
- qualidade do sono em mulheres com fibromialgia da cidade de Santa Cruz, RN.

## **Avaliação dos Riscos e Benefícios:**

O pesquisador apresenta os riscos e benefícios da pesquisa, bem como seus riscos com a respectiva forma de minimiza-los.

## **Comentários e Considerações sobre a Pesquisa:**

O projeto apresenta temática interessante e relevante para área da pesquisa, estando condizente com o nível de abrangência, buscando avaliar a efetividade do método pilates em solo na melhora da dor em mulheres com fibromialgia da cidade de Santa Cruz, RN.

## **Considerações sobre os Termos de apresentação obrigatória:**

Todos os termos obrigatórios estão presentes.

## **Recomendações:**

Nada a referir.

## **Conclusões ou Pendências e Lista de Inadequações:**

Todas as pendências foram atendidas totalmente.

## **Considerações Finais a critério do CEP:**

1. Apresentar relatório parcial da pesquisa, semestralmente, a contar do início da mesma.
2. Apresentar relatório final da pesquisa até 30 dias após o término da mesma.
3. O CEP FACISA deverá ser informado de todos os efeitos adversos ou fatos relevantes que alterem o curso normal do estudo.
4. Quaisquer documentações encaminhadas ao CEP FACISA deverão conter junto uma Carta de Encaminhamento, em que conste o objetivo e justificativa do que esteja sendo apresentado.
5. Caso a pesquisa seja suspensa ou encerrada antes do previsto, o CEP FACISA deverá ser comunicado, estando os motivos expressos no relatório final a ser apresentado.
6. O TCLE deverá ser obtido em duas vias, uma ficará com o pesquisador e a outra com o sujeito

**Endereço:** Rua Trairi S/N

**Bairro:** S/B

**CEP:** 59.200-000

**UF:** RN

**Município:** SANTA CRUZ

**Telefone:** (84)3291-2411

**E-mail:** cep@facisa.ufrn.br

# UFRN - FACULDADE DE CIÊNCIAS DA SAÚDE - FACISA



Continuação do Parecer: 2.116.314

de pesquisa.

7. Em conformidade com a Carta Circular nº. 003/2011 CONEP/CNS, faz-se obrigatório a rubrica em todas as páginas do TCLE pelo sujeito de pesquisa ou seu responsável e pelo pesquisador.

## Este parecer foi elaborado baseado nos documentos abaixo relacionados:

| Tipo Documento                                            | Arquivo                                      | Postagem               | Autor                    | Situação |
|-----------------------------------------------------------|----------------------------------------------|------------------------|--------------------------|----------|
| Informações Básicas do Projeto                            | PB_INFORMAÇÕES_BÁSICAS_DO_PROJETO_899030.pdf | 23/05/2017<br>14:31:41 |                          | Aceito   |
| Outros                                                    | CARTAaoCEPpilates.doc                        | 23/05/2017<br>14:31:23 | Marcelo Cardoso de Souza | Aceito   |
| TCLE / Termos de Assentimento / Justificativa de Ausência | TCLEmodificado.doc                           | 22/05/2017<br>10:19:06 | Marcelo Cardoso de Souza | Aceito   |
| Projeto Detalhado / Brochura Investigador                 | projetoIcmodificado.pdf                      | 22/05/2017<br>10:18:48 | Marcelo Cardoso de Souza | Aceito   |
| Outros                                                    | CartaAnuencia.pdf                            | 10/04/2017<br>20:24:53 | Marcelo Cardoso de Souza | Aceito   |
| Folha de Rosto                                            | folharostopilates.pdf                        | 10/04/2017<br>14:41:05 | Marcelo Cardoso de Souza | Aceito   |
| Outros                                                    | CONFIDENCIALIDADE.doc                        | 09/04/2017<br>10:34:31 | Marcelo Cardoso de Souza | Aceito   |
| Outros                                                    | Compromissoetico.doc                         | 09/04/2017<br>10:33:22 | Marcelo Cardoso de Souza | Aceito   |
| Outros                                                    | ficha_cep.doc                                | 09/04/2017<br>10:32:50 | Marcelo Cardoso de Souza | Aceito   |

### Situação do Parecer:

Aprovado

### Necessita Apreciação da CONEP:

Não

SANTA CRUZ, 13 de Junho de 2017

Assinado por:

**Thaiza Teixeira Xavier Nobre**  
(Coordenador)

**Endereço:** Rua Trairi S/N

**Bairro:** S/B

**CEP:** 59.200-000

**UF:** RN

**Município:** SANTA CRUZ

**Telefone:** (84)3291-2411

**E-mail:** cep@facisa.ufrn.br

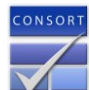

## CONSORT 2010 checklist of information to include when reporting a randomised trial\*

| Section/Topic                    | Item No | Checklist item                                                                                                                                                                              | Reported on page No |
|----------------------------------|---------|---------------------------------------------------------------------------------------------------------------------------------------------------------------------------------------------|---------------------|
| <b>Title and abstract</b>        |         |                                                                                                                                                                                             |                     |
|                                  | 1a      | Identification as a randomised trial in the title                                                                                                                                           | 1                   |
|                                  | 1b      | Structured summary of trial design, methods, results, and conclusions (for specific guidance see CONSORT for abstracts)                                                                     | 2                   |
| <b>Introduction</b>              |         |                                                                                                                                                                                             |                     |
| Background and objectives        | 2a      | Scientific background and explanation of rationale                                                                                                                                          | 3,4                 |
|                                  | 2b      | Specific objectives or hypotheses                                                                                                                                                           | 5                   |
| <b>Methods</b>                   |         |                                                                                                                                                                                             |                     |
| Trial design                     | 3a      | Description of trial design (such as parallel, factorial) including allocation ratio                                                                                                        | 5                   |
|                                  | 3b      | Important changes to methods after trial commencement (such as eligibility criteria), with reasons                                                                                          | 6                   |
| Participants                     | 4a      | Eligibility criteria for participants                                                                                                                                                       | 6                   |
|                                  | 4b      | Settings and locations where the data were collected                                                                                                                                        | 7                   |
| Interventions                    | 5       | The interventions for each group with sufficient details to allow replication, including how and when they were actually administered                                                       | 8,9,10,11           |
| Outcomes                         | 6a      | Completely defined pre-specified primary and secondary outcome measures, including how and when they were assessed                                                                          | 12                  |
|                                  | 6b      | Any changes to trial outcomes after the trial commenced, with reasons                                                                                                                       |                     |
| Sample size                      | 7a      | How sample size was determined                                                                                                                                                              | 14                  |
|                                  | 7b      | When applicable, explanation of any interim analyses and stopping guidelines                                                                                                                |                     |
| <b>Randomisation:</b>            |         |                                                                                                                                                                                             |                     |
| Sequence generation              | 8a      | Method used to generate the random allocation sequence                                                                                                                                      | 7                   |
|                                  | 8b      | Type of randomisation; details of any restriction (such as blocking and block size)                                                                                                         | 7                   |
| Allocation concealment mechanism | 9       | Mechanism used to implement the random allocation sequence (such as sequentially numbered containers), describing any steps taken to conceal the sequence until interventions were assigned | 7                   |
| Implementation                   | 10      | Who generated the random allocation sequence, who enrolled participants, and who assigned participants to interventions                                                                     |                     |
| Blinding                         | 11a     | If done, who was blinded after assignment to interventions (for example, participants, care providers, those                                                                                |                     |

|                                                      |     |                                                                                                                                                   |    |
|------------------------------------------------------|-----|---------------------------------------------------------------------------------------------------------------------------------------------------|----|
|                                                      |     | assessing outcomes) and how                                                                                                                       |    |
|                                                      | 11b | If relevant, description of the similarity of interventions                                                                                       |    |
| Statistical methods                                  | 12a | Statistical methods used to compare groups for primary and secondary outcomes                                                                     | 15 |
|                                                      | 12b | Methods for additional analyses, such as subgroup analyses and adjusted analyses                                                                  | 15 |
| <b>Results</b>                                       |     |                                                                                                                                                   |    |
| Participant flow (a diagram is strongly recommended) | 13a | For each group, the numbers of participants who were randomly assigned, received intended treatment, and were analysed for the primary outcome    |    |
|                                                      | 13b | For each group, losses and exclusions after randomisation, together with reasons                                                                  |    |
| Recruitment                                          | 14a | Dates defining the periods of recruitment and follow-up                                                                                           |    |
|                                                      | 14b | Why the trial ended or was stopped                                                                                                                |    |
| Baseline data                                        | 15  | A table showing baseline demographic and clinical characteristics for each group                                                                  |    |
| Numbers analysed                                     | 16  | For each group, number of participants (denominator) included in each analysis and whether the analysis was by original assigned groups           |    |
| Outcomes and estimation                              | 17a | For each primary and secondary outcome, results for each group, and the estimated effect size and its precision (such as 95% confidence interval) |    |
|                                                      | 17b | For binary outcomes, presentation of both absolute and relative effect sizes is recommended                                                       |    |
| Ancillary analyses                                   | 18  | Results of any other analyses performed, including subgroup analyses and adjusted analyses, distinguishing pre-specified from exploratory         |    |
| Harms                                                | 19  | All important harms or unintended effects in each group (for specific guidance see CONSORT for harms)                                             |    |
| <b>Discussion</b>                                    |     |                                                                                                                                                   |    |
| Limitations                                          | 20  | Trial limitations, addressing sources of potential bias, imprecision, and, if relevant, multiplicity of analyses                                  |    |
| Generalisability                                     | 21  | Generalisability (external validity, applicability) of the trial findings                                                                         |    |
| Interpretation                                       | 22  | Interpretation consistent with results, balancing benefits and harms, and considering other relevant evidence                                     |    |
| <b>Other information</b>                             |     |                                                                                                                                                   |    |
| Registration                                         | 23  | Registration number and name of trial registry                                                                                                    | 3  |
| Protocol                                             | 24  | Where the full trial protocol can be accessed, if available                                                                                       |    |
| Funding                                              | 25  | Sources of funding and other support (such as supply of drugs), role of funders                                                                   |    |

\*We strongly recommend reading this statement in conjunction with the CONSORT 2010 Explanation and Elaboration for important clarifications on all the items. If relevant, we also recommend reading CONSORT extensions for cluster randomised trials, non-inferiority and equivalence trials, non-pharmacological treatments, herbal interventions, and pragmatic trials. Additional extensions are forthcoming: for those and for up to date references relevant to this checklist, see [www.consort-statement.org](http://www.consort-statement.org).



# BMJ Open

## Mat Pilates and aquatic aerobic exercises for women with fibromyalgia. A protocol for a randomized controlled blind study

|                                 |                                                                                                                                                                                                                                                                                                                                                                                                                                                                                                                                                                                                                                                                                            |
|---------------------------------|--------------------------------------------------------------------------------------------------------------------------------------------------------------------------------------------------------------------------------------------------------------------------------------------------------------------------------------------------------------------------------------------------------------------------------------------------------------------------------------------------------------------------------------------------------------------------------------------------------------------------------------------------------------------------------------------|
| Journal:                        | <i>BMJ Open</i>                                                                                                                                                                                                                                                                                                                                                                                                                                                                                                                                                                                                                                                                            |
| Manuscript ID                   | bmjopen-2018-022306.R1                                                                                                                                                                                                                                                                                                                                                                                                                                                                                                                                                                                                                                                                     |
| Article Type:                   | Protocol                                                                                                                                                                                                                                                                                                                                                                                                                                                                                                                                                                                                                                                                                   |
| Date Submitted by the Author:   | 19-Jul-2018                                                                                                                                                                                                                                                                                                                                                                                                                                                                                                                                                                                                                                                                                |
| Complete List of Authors:       | Silva, Hugo Jario de Almeida; Universidade Federal do Rio Grande do Norte, Faculdade de Ciências da Saúde do Trairi<br>Lins, Caio Alano de Almeida; Universidade Federal do Rio Grande do Norte, Faculdade de Ciências da Saúde do Trairi<br>Nobre, Thaiza Teixeira Xavier ; Universidade Federal do Rio Grande do Norte, Faculdade de Ciências da Saúde do Trairi<br>de Sousa, Vanessa Patrícia Soares ; Universidade Federal do Rio Grande do Norte, Faculdade de Ciências da Saúde do Trairi<br>Caldas, Renata Trajano Jorge ; Faculdade Santa Terezinha, Fisioterapia de Souza, Marcelo Cardoso; Universidade Federal do Rio Grande do Norte, Faculdade de Ciências da Saúde do Trairi |
| <b>Primary Subject Heading</b>: | Rehabilitation medicine                                                                                                                                                                                                                                                                                                                                                                                                                                                                                                                                                                                                                                                                    |
| Secondary Subject Heading:      | Rheumatology                                                                                                                                                                                                                                                                                                                                                                                                                                                                                                                                                                                                                                                                               |
| Keywords:                       | fibromyalgia, Pilates, aquatic aerobic excises, Chronic pain                                                                                                                                                                                                                                                                                                                                                                                                                                                                                                                                                                                                                               |
|                                 |                                                                                                                                                                                                                                                                                                                                                                                                                                                                                                                                                                                                                                                                                            |

SCHOLARONE™  
Manuscripts

1  
2  
3 **Mat Pilates and aquatic aerobic exercises for women with fibromyalgia. A protocol**  
4 **for a randomized controlled blind study**  
5  
6

7 Hugo Jario de Almeida Silva<sup>1</sup>, Caio Alano de Almeida Lins<sup>2</sup>, Thaiza Teixeira Xavier  
8 Nobre<sup>2</sup>, Vanessa Patrícia Soares de Sousa<sup>2</sup>, Renata Trajano Jorge Caldas<sup>3</sup>, Marcelo  
9 Cardoso de Souza<sup>2\*</sup>  
10  
11  
12  
13  
14  
15

- 16  
17 1- PT, MSc student. Federal University of Rio Grande do Norte, Faculty of Health  
18 Sciences of Trairi – UFRN/FACISA, Santa Cruz, RN – Brazil.  
19  
20 2- PT, PhD. Professor of Physiotherapy Course – Federal University of Rio Grande  
21 do Norte, Faculty of Health Sciences of Trairi – UFRN/FACISA, Santa Cruz,  
22 RN – Brazil.  
23  
24 3- PT, PhD. Professor of Faculdade Santa Terezinha – CEST, Physiotherapy  
25 Course. São Luís, MA - Brazil.  
26  
27  
28

29  
30 \*Corresponding author:  
31

32  
33 Prof. Marcelo Cardoso de Souza, PT, PhD.  
34 Federal University of Rio Grande do Norte - Faculty of Health Sciences of Trairi  
35 (UFRN/FACISA)  
36 Master's Program in Collective Health UFRN/FACISA.  
37 Master's Program in Rehabilitation Sciences UFRN/FACISA.  
38 Barão do Rio Branco Avenue, 435, Centro, Santa Cruz, Rio Grande do Norte,  
39 Brazil.  
40  
41 Zip code: 59200-000  
42  
43 Phone: +55 (84) 3291.2411  
44  
45 Email: marcellogv@hotmail.com  
46  
47  
48  
49  
50  
51  
52  
53  
54  
55  
56  
57  
58  
59  
60

## Abstract

**Introduction:** Physical exercises have been recommended to improve overall well-being in patients with fibromyalgia, with the main objective to repair the effects of lack of physical conditioning and to improve symptoms, especially pain and fatigue. Although widely recommended and widely known, few studies support the use of the Pilates method as effective for improving the symptoms of the disease, comparing it with other well-founded exercise modalities. This protocol was developed to describe the design of a randomized controlled study with a blind evaluator that evaluates the effectiveness of the mat Pilates method in comparing it with aquatic aerobic exercises for improving pain in women with fibromyalgia.

**Methods:** Sixty (60) women aged 18 to 60 years with fibromyalgia diagnosis, a score of between 3 and 8 points on the visual analog scale for pain, and who sign the clear and informed consent form will be recruited according to the inclusion criteria. They will be randomized into one of the two intervention groups: (i) Pilates, to perform an exercise program based on the Mat Pilates method; and (ii) aquatic exercise, to participate in a program of aerobic exercises in the swimming pool. The protocol will correspond to 12 weeks of treatment, with both groups performing the exercises with supervision twice a week. The primary outcome will be pain (Visual Analogue Scale for pain). Secondary outcomes are to include impacts related to the disease, functional capacity, sleep quality and overall quality of life. The evaluations will be performed at three moments: baseline, after 6 weeks and 12 weeks of treatment.

**Ethics and dissemination:** This is a pioneering study for evaluating the effectiveness of the Mat Pilates method in comparing it with aquatic aerobic exercises with a follow-up of 12 weeks, thus becoming a new contribution to fibromyalgia treatment. In addition, the implementation of the protocol in question may contribute to elucidate the effects of the Mat Pilates method in patients with fibromyalgia, as well as the frequency and adequate duration of exercise to improve symptoms.

**Trial registrations:** ClinicalTrials.gov Identifier (NCT03149198), May 11, 2017. Approved by the Ethics Committee of FACISA/UFRN (Number: 2.116.314).

**Keywords:** Chronic pain, therapeutic exercise, aerobic exercise, Pilates, fibromyalgia treatment.

### Strengths and limitations of this study

- Pilates is a very recommended exercise concept for women with fibromyalgia, but there is little evidence of high quality for their use.
- It is important to compare a mode known as pilates with another type of exercise, the aerobic exercise, this time performed in the water.
- It is necessary that new exercise interventions for fibromyalgia be tested and compared so that they can be recommended based on evidence.
- It is difficult to perform a double-blind study with exercises, since the participant knows what exercise is performing.

### Background

Fibromyalgia (FM) is a syndrome characterized by chronic generalized pain and sleep disorder, fatigue, reduced muscle strength, depression, anxiety, irritable bowel, and other symptoms that cause impairment to quality of life [1-3]. The prevalence of FM in the general population ranges from 0.66 to 4.4%, varying according to the profile of patients evaluated and the study methodology. Most studies indicate that FM is more prevalent in women than in men, at a ratio of 8 to 1, especially in the age group between 35 and 60 years. Studies with adolescent children and special groups are scarce and few are conclusive. A study carried out in Brazil confirms that FM was the second most frequent rheumatic disease in outpatient clinics, only after osteoarthritis [4].

The causes for the onset of this syndrome have not yet been fully elucidated. However, recent scientific research suggests that changes in the metabolism and regulation of certain substances of the central nervous system such as serotonin and noradrenaline can trigger the disease [5].

With a controversial etiopathogenesis, the cause of FM is associated with genetic, environmental and neuromodulatory factors [6]. Many patients with FM have high levels of stress and feelings of depression, anxiety and frustration [7]. Patients feel fatigue and physical tiredness with a loss of energy, and decreased strength when performing physical exercises. This fatigue causes a great decrease in quality of life and often prevents performing activities of daily living, thereby reducing productivity in the work environment.

1  
2  
3 Therefore, physical exercises have been recommended to improve the overall  
4 well-being in women with FM, with the main purpose of repairing the effects of a lack  
5 of physical conditioning and improving the symptoms, especially pain and fatigue.  
6 Valim et al. (2013) report that physical exercises in FM are beneficial, low-cost and  
7 promote improvement in pain and other symptoms of the disease [8].  
8  
9

10  
11 The importance of physical exercise for women with FM is already well  
12 described in the literature, in addition to it being a low-cost, safe and efficient  
13 intervention as a form of treatment. Exercises have also been shown to be effective in  
14 reducing pain and the number of painful points, improving quality of life, mood and  
15 other psychological aspects. Although studies show benefits in almost all exercise  
16 modalities, further evidence supports the practice of aerobic training [9,10]. Within this  
17 perspective, a Cochrane review on aquatic exercises for FM showed that aquatic  
18 exercises are effective in improving physical well-being, functional capacity, pain, a  
19 37% improvement in muscular strength and improvement in cardiovascular capacity  
20 [11].  
21  
22

23  
24 For some while the Pilates method of exercising has been gaining popularity,  
25 being considered one more exercise modality that can be used. This method consists of  
26 a system of stretching and strengthening exercises developed by Joseph H. Pilates  
27 almost 90 years ago, which employs controlled and precise sets of movements and the  
28 use of special equipment. Exercises can also be performed in different positions on the  
29 ground on a mat, avoiding excessive impact or pressure on muscles, joints and tissues.  
30 The purpose of physical training using the Pilates method is to achieve better  
31 functioning of the body based on strengthening the core, a term that refers to the center  
32 of the trunk that supports the body (rectus abdominus, transverse abdominus, erector  
33 spinae, diaphragm and pelvic floor muscles). The second major feature of the method  
34 are the six basic principles: centralization, concentration, control, precision, breathing,  
35 and flow [12].  
36  
37

38  
39 Although highly recommended and widely known, few studies have evaluated  
40 the effects of the method for the treatment of women with FM. In addition, these studies  
41 present several methodological flaws that compromise their results and suggest that  
42 studies with better methodological design should be conducted with the objective of  
43 observing the effectiveness of the Pilates method in treating these patients [13,14].  
44 Therefore, the main objective of this study is to evaluate the effectiveness of the Mat  
45 Pilates method in improving pain in women with FM, and comparing it with aquatic  
46  
47  
48  
49  
50  
51  
52  
53  
54  
55  
56  
57  
58  
59  
60

1  
2  
3 aerobic exercises. Our hypothesis is that the Mat Pilates method can also bring benefits  
4 for improving pain in women with FM, similar to aquatic aerobic exercises. The  
5 secondary objectives of the study are to compare the impact of disease, functionality  
6 and performance, sleep quality and quality of life in women with FM who perform two  
7 different modalities of exercise.  
8  
9  
10

## 11 12 13 14 **Methods**

### 15 **Design**

16  
17 Study protocol for a randomized controlled parallel group single-blind trial. This  
18 study has been registered (ClinicalTrials.gov Identifier: NCT03149198). Participants  
19 will be randomized to perform mat Pilates or aerobic exercises. Allocation to either  
20 group (Mat pilates or aquatic aerobic exercises) will be achieved through a computer-  
21 generated sequence of random numbers. The allocation sequence will be created and  
22 carried out by a non-interventionist researcher in charge of telephone screening and  
23 handling the data obtained in the various assessment sessions.  
24  
25  
26  
27

28  
29 Figure 1 shows a flowchart of the progress of the various stages of this test. This  
30 study was approved by the Ethics Committee of Federal University of Rio Grande do  
31 Norte, Faculty of Health Sciences of Trairi – (FACISA/UFRN) (Number: 2.116.314).  
32  
33  
34

### 35 **Participants**

36  
37 Sixty (60) women aged 18 to 60 years, with a clinical diagnosis of FM according  
38 to the criteria of the American College of Rheumatology [15] and scoring between 3  
39 and 8 points on the visual analogue pain scale will be recruited, provided they give their  
40 consent after being informed of the study's objectives and procedures. The volunteers  
41 will be recruited from the waiting list of patients of the Physiotherapy School Clinic of  
42 FACISA/UFRN; in addition, the project will also be announced by radio and local  
43 media. After this, a telephone contact will first be made to clarify any questions from  
44 the participants, and the first screening for inclusion will be carried out.  
45  
46  
47  
48

49  
50 Personal data of the participants will be numerically coded and stored in a  
51 database, which can only be accessed by the researcher responsible for the  
52 randomization and blinding process. Informed consent as well as all study information  
53 will be passed on to all participants. Prior to any data collection, participants must sign  
54 the clear and informed consent form.  
55  
56  
57  
58  
59  
60

#### Inclusion criteria:

- Women diagnosed with FM according to the American College of Rheumatology classification criteria.
- Aged between 18 and 60 years.
- Reporting pain between 3 and 8 on the VAS.

#### Exclusion Criteria:

- uncontrolled hypertension
- decompensated cardiorespiratory disease
- history of syncope or arrhythmias induced by physical exercise
- decompensated diabetes
- serious psychiatric illness
- Primarily Systemic Exertion Intolerance Disease
- thyroid issues
- obesity
- history of regular exercise (at least 2 times a week) in the last 6 months
- any other condition that makes it impossible for the patient to perform physical exercises.

#### Research team

This study will involve 5 researchers; 1 researcher responsible for the evaluations; 2 researchers responsible for the interventions (1 for each group); 1 researcher responsible for the interview, initial screening and randomization of participants, and 1 researcher who will perform the statistical analysis.

#### Patient and Public Involvement

The main question of the study was developed to answer a gap in the literature on the comparison of different modalities of physical exercises for the treatment of fibromyalgia, although no participant in the study was involved so far. At the end of the study, the results will be disseminated to the participants in the form of a lecture and fellowship, showing the effects found in the studied variables. If superiority of one modality is found over the other, it will be offered and guaranteed to the participants.

## Randomization and blinding

Participants who are successfully approved for screening and who agree to sign the free and informed consent form will receive a number in a randomization table according to the inclusion order in the study. These numbers will correspond to the Pilates group or aquatic exercise group in which volunteers will be included. This distribution will be performed randomly through the website *randomization.com*. The allocation will be concealed using sealed and opaque envelopes, numbered consecutively. An independent researcher who will not participate in [the](#) other study procedures will perform the randomization process. The flow diagram of the study is summarised in Fig. 1.

The researchers responsible for interventions will be blinded to the participants' initial assessments, and the researcher responsible for evaluations will not know the group of each participant.

In addition, data collected during participant evaluations will not be revealed to the researchers responsible for interventions, and participants will be instructed not to disclose their experience and information related to the intervention.

Finally, the researcher responsible for statistical analysis will be blinded. Once the intervention is completed, he/she will receive an Excel data table with all necessary data without identification of the subjects or the groups.

## Interventions

Participants in this study will receive 24 treatment sessions (two per week) for 12 weeks. Evaluations will be performed prior to the start of treatment, after 12 sessions and after 24 treatment sessions.

### Mat Pilates Exercise Program

The exercise program based on the Pilates method will be carried out on a mat, in the Group Room of the Clinic School of Physiotherapy of the *FACISA/UFRN* in Santa Cruz, RN, Brazil. The room has ample space and air conditioning for better patient accommodation. The exercises will be performed twice a week for 12 weeks. Each session will last about 50 minutes and will be supervised by an experienced Mat Pilates researcher who will be responsible for the intervention in this group. A total of



10 exercises will be performed, which are presented in Table 1. Chart 1 shows the progression of the exercises according to the time.

Chart 1: Exercise progression according to the intervention time

| Period                                                     | Dose                     |
|------------------------------------------------------------|--------------------------|
| First month (1 <sup>st</sup> to 8 <sup>th</sup> session)   | 1 set of 8 repetitions   |
| Second month (8 <sup>th</sup> to 16 <sup>th</sup> session) | 2 sets of 10 repetitions |
| Third month (16 <sup>th</sup> to 24 <sup>th</sup> session) | 3 sets of 8 repetitions  |

Intervention group exercise program

Table 1: Mat Pilates Group Exercise Program

| <u>NAME OF THE EXERCISE</u>                                                                                                                                        | <u>DESCRIPTION</u>                                                                                                                                                                                                                                                   |
|--------------------------------------------------------------------------------------------------------------------------------------------------------------------|----------------------------------------------------------------------------------------------------------------------------------------------------------------------------------------------------------------------------------------------------------------------|
| 1 - SWAN<br>Stretches the anterior trunk chain.<br>Strengthens pectoral, triceps and anterior deltoid muscles.                                                     | 1 – Lying in the prone position, hands resting in the direction of the shoulders.<br>2 – Extend the elbows, keeping head aligned with spine, extending/stretching the trunk.<br>3 – Return to the initial position.                                                  |
| 2 – ONE LEG UP-DOWN<br>Strengthens the rectus femoris, iliopsoas and sartorius muscles.                                                                            | 1 – Lying in the supine position, arms outstretched alongside the body.<br>2 – Raise leg in extension with feet in plantar flexion.<br>3 – Return to the initial position.                                                                                           |
| 3 – LEG CIRCLES<br>Strengthens the rectus femoris, sartorius, adductor, gluteus medius muscles.                                                                    | 1 – Lying in the supine position, arms outstretched alongside the body and supported on the ground.<br>2 – Raise leg in extension, with feet in plantar flexion.<br>3 – Make circles with the leg.                                                                   |
| 4 – SINGLE LEG STRETCH<br>Strengthens the abdomen, stretches the glutes and the lumbar spine.                                                                      | 1 – Lying in the supine position, flex the right leg by placing the left hand on the right knee and the right hand on the right ankle, flexing as much as possible toward the chest. The left leg will be extended at an angle of 30°.<br>2 – Slowly switch the leg. |
| 5 – SAW<br>Stretches trunk rotators, the hamstrings and the quadratus lumborum muscle.<br>Strengthens the rectus abdominis, external and internal oblique muscles. | 1 – Sitting with the back straight and legs apart at hip width, arms extended and apart at shoulder height.<br>2 – Slowly from the waist, twist the spine to the left.                                                                                               |

|                                                                                                                                                                                                 |                                                                                                                                                                                                                                                                                             |
|-------------------------------------------------------------------------------------------------------------------------------------------------------------------------------------------------|---------------------------------------------------------------------------------------------------------------------------------------------------------------------------------------------------------------------------------------------------------------------------------------------|
|                                                                                                                                                                                                 | <p>3 – Move the right arm toward the left foot and the left arm back at shoulder height.</p> <p>4 – Return to the initial position and switch sides.</p>                                                                                                                                    |
| <p>6 – SIDE KICKS: FRONT AND BACK</p> <p>Strengthens the rectus femoris, iliopsoas, sartorius, gluteus medius, gluteus maximus and abdominal muscles in isometry.</p>                           | <p>1 – Lying straight in lateral decubitus, arm flexed and hand resting under the head.</p> <p>2 – Keep your upper leg aligned with your hips and slowly bring the extended leg forward.</p> <p>3 – Return to the initial position.</p>                                                     |
| <p>7 – THE HUNDRED</p> <p>Strengthens the abdominal, oblique, transverse and rectus femoris muscles.</p>                                                                                        | <p>1 – Lying in the supine position, elbow extended with the shoulder, hips and knees at 90°.</p> <p>2 – Knee extension at approximately 45°. Slight bending of the trunk (removing the shoulder blades from the mat) and chin toward chest.</p> <p>3 – Return to the initial position.</p> |
| <p>8 – PELVIC LIFT ON THE BALL</p> <p>Strengthens the gluteus maximus, biceps femoris, semitendinosus, semimembranosus, gastrocnemius, and quadriceps femoris muscles. Mobilizes the spine.</p> | <p>1 – Lying in the supine position, legs flexed at 90°, with heels on the ball.</p> <p>2 – Raise the hips from the mat, extending the legs.</p> <p>3 – Return to the initial position.</p>                                                                                                 |
| <p>9 – SIT-UPS ON THE BALL</p> <p>Strengthens rectus abdominis and external oblique muscles.</p>                                                                                                | <p>1 – Lying in the supine position holding the ball over the head and legs at a 45°.</p> <p>2 – Bring the ball toward the legs and hold it.</p> <p>3 – Return to the initial position.</p>                                                                                                 |
| <p>10 – STRETCHING ON THE BALL</p> <p>Stretching and muscle relaxation.</p>                                                                                                                     | <p>1 – Lying in lateral, ventral and dorsal decubitus on the ball.</p>                                                                                                                                                                                                                      |

### Aquatic Aerobic Exercise Program

The aerobic exercise program will be carried out at the therapeutic swimming pool of the Physiotherapy School Clinic at the *FACISA/UFRN* in Santa Cruz, RN. The pool is heated (30°C), which provides better effects to the proposed treatment.

The exercises will be performed twice a week for 12 weeks. Each session will last about 50 minutes and will be supervised by an experienced researcher responsible for the intervention in this group.

Patients will always be instructed to perform the exercise according to their current conditioning and increase the intensity according to their perception of exertion (Borg scale). The program is best described in Table 2.

Table 2: Aquatic aerobic exercises group exercise program.

| TIME                                | EXERCISE                                                                                                                                                                                                                                                                                                                                                                           |
|-------------------------------------|------------------------------------------------------------------------------------------------------------------------------------------------------------------------------------------------------------------------------------------------------------------------------------------------------------------------------------------------------------------------------------|
| 5 min – Warm-up.                    | 1 - Walking in a clockwise circle at a slow pace.<br>2 - Walking in a counterclockwise circle at a slow pace.<br>3 - Walking with abduction/adduction in the horizontal plane of the upper limbs at a fast pace.<br>4 - Walking with knee flexion and alternating hip flexion and hand on opposite knee at a fast pace.                                                            |
| 30 min – Aquatic aerobic exercises. | 1 - Rapid tiptoe walking (2 laps in the pool)<br>2 - Fast walking on the heels (2 laps in the pool).<br>3 - Quick lateral marching (2 laps in the pool).<br>4 - Circles against the turbulent water flow.<br>5 - Rhythmic waist circles using pool noodles and floaters.<br>6 - Rhythmic movement of upper and lower limbs.                                                        |
| 5 min – Cool-down.                  | 1 - Walking in a clockwise circle at a slow pace.<br>2 - Walking in a counterclockwise circle at a slow pace.<br>3 - Walking with abduction/adduction in the horizontal plane of the upper limbs at a slow pace.<br>4 - Walking with knee flexion and alternating hip flexion and hand on the opposite knee at a slow pace.<br>5 - Respiratory exercises of diaphragmatic pattern. |

### Evaluations

During the baseline measurement, the following descriptive characteristics will be collected: gender, age, weight, height, current occupation. The chronology of the evaluation of the primary and secondary outcome measures is shown in Table 3.

### Primary outcome measures

The Visual Analogue Scale (VAS) for pain is the main result of this study and will be used for the intensity of pain. Participants will mark the intensity of their pain on the VAS consisting of a 100-mm long horizontal line, which is anchored by the classifications of “no pain” at the left end (score 0) and “worst pain imaginable” rightmost (score 10), asking the participant for the most intense pain episode perceived

1  
2  
3 while doing daily activities. The VAS has demonstrated the ability to detect changes in  
4 pain, establishing a minimal clinically significant difference at 2.5 cm [16].  
5  
6

## 7 8 Secondary outcome measures 9

- 10  
11 1. Impact related to the disease: the evaluation will be performed using the FIQ  
12 (*Fibromyalgia Impact Questionnaire*), a questionnaire that assesses anxiety,  
13 depression and physical performance in FM. The translated version adapted for  
14 the Brazilian population will be used [17].  
15
- 16  
17 2. Functional capacity:  
18
  - 19 • “*Timed Up and Go test*” (TUG), a functional test consisting of getting up  
20 from a chair without the aid of the arms, walking a distance of three meters,  
21 turning around and walking back. At the start of the test, the patient should  
22 have his or her back resting on the back of the chair. The patient then  
23 receives the “go” command to perform the test and they are timed from the  
24 command voice until the moment they rest their back on the chair again  
25 [18,19].  
26
  - 27 • *Six-minute Walk Test* (6MWT), to measure the walking performance of  
28 patients . The test will be performed on a 20-meter marked gymnasium track  
29 away from other people. The patients will be instructed to walk the entire  
30 distance, being able to interrupt the test if they do not feel able to continue  
31 [19].  
32
- 33  
34 3. Assessment of sleep quality:  
35
  - 36 • *Pittsburgh Sleep Quality Index* – the Brazilian Portuguese version (PSQI-  
37 BR) will be used to evaluate the subjective quality of sleep. This  
38 questionnaire consists of nineteen items grouped into seven components,  
39 which are scored on a scale from 0 to 3. The components are: (1) subjective  
40 quality of sleep; (2) sleep latency; (3) duration of sleep; (4) habitual sleep  
41 efficiency; (5) sleep disorders; (6) use of medication for sleep; and (7)  
42 daytime dysfunction. The values corresponding to respondents’ responses for  
43 each component are summed up to give an overall PSQI score, which ranges  
44 from 0 to 21. Scores between 0-4 indicate good sleep quality, while 5-10  
45 scores indicate poor quality, and above 10 indicate sleep disturbance [20].  
46  
47  
48  
49  
50  
51  
52  
53  
54  
55  
56  
57  
58  
59  
60

- *Epworth Sleepiness Scale* version in Brazilian Portuguese (ESS-BR) will be used to measure the possibility of dozing off. The questionnaire consists of eight daily situations where the probability of dozing off is graded on a scale from zero (no probability of dozing off) to three (very likely to doze off). At the end, the scores are summed up to generate a total score ranging from 0-24, where an individual above 10 points is characterized with excessive drowsiness [21].
4. Overall quality of life: will be assessed by the *Short Form-36 Health Survey*, a quality of life questionnaire, translated into Portuguese, containing 36 questions. The result is given in 8 domains: physical functioning, role physical, role emotional, bodily pain, vitality, mental health, social functioning, and general health, with scores ranging from 0-100 in each domain, in which 100 is the best health state and 0 the worst health state [22].

Table 3 Chronology of primary and secondary outcome measures

| Results          | baseline | 6 week | 12 week |
|------------------|----------|--------|---------|
| <i>Primary</i>   |          |        |         |
| VAS              | ✓        | ✓      | ✓       |
| <i>Secondary</i> |          |        |         |
| FIQ              | ✓        | ✓      | ✓       |
| TUG              | ✓        | ✓      | ✓       |
| 6MWT             | ✓        | ✓      | ✓       |
| PSQI-BR          | ✓        | ✓      | ✓       |
| ESS-BR           | ✓        | ✓      | ✓       |
| SF-36            | ✓        | ✓      | ✓       |

VAS= *Visual Analogue Scale* for pain, FIQ= *Fibromyalgia Impact Questionnaire*, TUG= *Timed Up and Go test*, 6MWT= *Six-minute Walk Test*, PSQI-BR= *Pittsburgh Sleep Quality Index* – the Brazilian Portuguese version, ESS-BR= *Epworth Sleepiness Scale* version in Brazilian Portuguese, SF-36= *Short Form-36 Health Survey*.

#### Training of researchers

A series of training stages prior to starting the study will be implemented for the assessment and treatment intending to protocolize the actions carried out in the study. In

1  
2  
3 these training stages, treatment techniques and measuring will be practiced in order to  
4 reach a consensus among the involved researchers.  
5  
6

## 7 Statistical issues

### 8 *Sample size calculation*

9  
10 The sample size was calculated based on the pain variable in order to find a  
11 difference of  $\pm 2.5$  points between the intervention groups on the visual analog pain  
12 scale - VAS [16], with a standard deviation of 2.5 points [23]. A sample of 60  
13 participants is required (30 in each group) in order to achieve a statistical power of 90%  
14 with a 5% alpha, and considering a loss rate of 20%. The sample calculation was  
15 performed for the ANOVA repeated measures statistical test with interaction between  
16 groups. Gpower3.1 software was used for the calculation.  
17  
18  
19  
20  
21  
22

### 23 *Statistical analysis*

24  
25 The analysis will be descriptive for all outcomes included in the study,  
26 expressing quantitative outcomes with their mean  $\pm$  standard deviation and qualitative  
27 outcomes with their absolute value, percentage and 95% confidence intervals.  
28  
29

30 Data will be analyzed by SPSS software. The chi-square test will be used to  
31 observe associations between the qualitative variables. After observing the normal  
32 distribution and homogeneity of the variances of the quantitative variables by means of  
33 the kolmogorov-Smirnov test and the Levene test, respectively, the Student's t-test (for  
34 variables with normal distribution) or the Mann-Whitney test (for variables with a non-  
35 normal distribution) will be used to perform a comparison of the means. Estimates of  
36 average effect (differences between groups) for all variables will be calculated using the  
37 ANOVA mixed model. This analysis model incorporated the intervention groups  
38 (Pilates and aquatic exercise), time (baseline, 6 weeks and 12 weeks) and the group  $\times$   
39 time interaction. When a significant F value is found, the Bonferroni post-hoc test will  
40 be applied in order to identify the differences. An intention-to-treat analysis will be used  
41 to assess the response to intervention, with the last evaluation carried forward when  
42 necessary. The size of the effect between the groups for the variables that present  
43 intergroup differences can be calculated at some point, with a respective 95%  
44 confidence interval. The level of statistical significance adopted will be 5%. The  
45 analysis will be performed by an independent researcher.  
46  
47  
48  
49  
50  
51  
52  
53  
54  
55  
56  
57  
58  
59  
60

## Discussion

This protocol will be carried out for a randomized single-blind clinical trial, in order to investigate whether mat Pilates produces similar beneficial effects to aquatic aerobic exercises in reducing pain and disability in women with FM. Secondary outcomes are to include impacts related to the disease, functional capacity, sleep quality and overall quality of life. With the conclusion of the study, we hope to test the following null hypothesis: “There is no difference in pain and disability for participants undergoing treatment with Mat Pilates or with aquatic aerobic exercises”.

Women with FM experience fatigue [24] and physical tiredness, with loss of energy, and decreased power/strength when performing physical exercises. Fatigue leads to a great decrease in quality of life and often prevents performance of activities of daily living, thereby reducing productivity in the workplace. Thus, physical exercises, and especially aerobic ones [25], have been recommended to improve overall well-being in women with FM, with the main purpose of repairing the effects of a lack of physical conditioning, and especially improving symptoms regarding pain and fatigue.

A recent Cochrane review on aerobic exercise in fibromyalgia concluded that, when compared to control, moderate quality evidence indicates that aerobic exercise is likely to improve quality of life, and poor quality evidence suggests that aerobic exercise may slightly decrease pain intensity, slightly improve physical function, and lead to a slight difference in fatigue and stiffness [26].

Regarding aquatic aerobic exercises, a meta-analysis [27] found good results for aquatic therapy (hydrotherapy) with a duration of over 20 weeks; however, in our study we will use aquatic exercises with an aerobic purpose, rather than just aquatic physiotherapy. *Deep water running* is an aquatic aerobic conditioning technique that has shown to be as beneficial as aerobic exercise on land, however with advantages related to emotional aspects in patients with fibromyalgia [28]. A systematic review carried out by Bidonde et al. (2014) concluded that the evidence of low to moderate quality in relation to the control suggests that aquatic training is beneficial for improving well-being, symptoms and fitness in adults with fibromyalgia. Low quality evidence suggests that there are benefits of aquatic and land exercise, except for muscle strength (low quality evidence favoring land exercises) and also that no serious adverse effects were found [11].

A recent protocol on aquatic exercise *versus* land exercises to treat balance and pain in women with fibromyalgia was published, showing the interest of the researchers

1  
2  
3 in deepening knowledge on the subject, since more well-designed studies are still  
4 necessary. However, our aquatic aerobic exercise program differs from the one used in  
5 this study due to the fact that it has the objective of working on more aspects related to  
6 balance and proprioception in water [29]. The Pilates method is currently well known  
7 and highly recommended by doctors and health professionals with the aim of improving  
8 pain, posture, stretching and strengthening of the body as a whole. Women with FM are  
9 frequently recommended to perform physical exercises to improve the FM symptoms,  
10 in which Pilates represents an important option to be considered. However, few studies  
11 have evaluated the effects of the method for the treatment of women with FM. In  
12 addition, these studies present several methodological flaws that compromise their  
13 results, suggesting that studies with better methodological design should be conducted  
14 with the objective of observing the effectiveness of the Pilates method in treating these  
15 womens [13,14].  
16  
17  
18  
19  
20  
21  
22  
23

24 Adherence to treatment is something very important to be reported, mainly in  
25 interventions for chronic musculoskeletal disorders [30]. We hope that the volunteers in  
26 our study will have good adherence to treatment, considering that the heated pool is a  
27 stimulating invitation for relaxation and that Pilates is a popular, famous and still  
28 relatively high-cost technique in our reality, thus we believe that our intervention will  
29 be well accepted.  
30  
31  
32  
33

34 In view of the above, we hope that the conclusion of this study contributes to  
35 scientific knowledge, providing subsidies for the use of physiotherapy as a safe and  
36 effective tool in treating women with FM,, as well as to help elucidate the best  
37 frequency and the adequate duration of exercise for improving the symptoms.  
38  
39

#### 40 **Abbreviations**

41 FM: fibromyalgia; FACISA/UFRN: Federal University of Rio Grande do Norte, Faculty  
42 of Health Sciences of Trairi; VAS: Visual Analogue Scale; FIQ: Fibromyalgia Impact  
43 Questionnaire; TUG: Timed Up and Go test; 6MWT: Six-minute Walk Test; PSQI-BR:  
44 Pittsburgh Sleep Quality Index – the Brazilian Portuguese version; ESS-BR: Epworth  
45 Sleepiness Scale version in Brazilian Portuguese; SF-36: Short Form-36 Health Survey.  
46  
47  
48  
49

#### 50 **Acknowledgements**

51 The authors are grateful to participants and FACISA/UFRN and the research director  
52 (PROPESQ/UFRN Edital N° 01/2017) for the support given to the research.  
53  
54

#### 55 **Funding**



1  
2  
3 Not applicable.

4  
5 **Availability of data and material**

6  
7 Not applicable.

8  
9 **Authors' contributions**

10 CAAL and MCS lead the study design and design and planned the statistical analysis.  
11 HJAS, TTXN, VPSS and RTJC have made substantial contributions to the design and  
12 design of the study. HJAS, CAAL, MCS, TTXN, VPSS and RTJC reviewed the  
13 manuscript critically and gave final approval for publication.  
14  
15

16  
17 **Competing interests**

18 The authors declare that they have no competing interests.

19  
20 **Consent for publication**

21  
22 Not applicable.

23  
24 **Ethics approval and consent to participate**

25  
26 This study was approved by the Ethics Committee of Federal University of Rio Grande  
27 do Norte, Faculty of Health Sciences of Trairi – (FACISA/UFRN) with registration  
28 code 2.116.314. The ethical principles agreed in the Declaration of Helsinki will be  
29 respected for all study procedures. Respect for individuals will be insured and their  
30 autonomy will be maintained. Participants will be informed of the study objectives, its  
31 risks and benefits. Participants will be free to abandon the study at any time without the  
32 obligation of giving any explanation. Participants must sign the informed consent before  
33 the study begins. This study protocol is registered in ClinicalTrials.gov (a U.S. National  
34 Institutes of Health service) with the identifier NCT03149198, published on 11th May,  
35 2017.  
36  
37  
38  
39  
40  
41  
42  
43  
44  
45  
46  
47  
48  
49  
50  
51  
52

53  
54 **References**

- 1  
2  
3 1. Gowans SE, Dehuek A, Voss S, Silaj A, Abbey SE. Six- Month and One-Year  
4 Followup of 23 Weeks of Aerobic Exercise for Individuals With Fibromyalgia. *Arthritis*  
5 *Rheum.* 2004;51:890-8.  
6  
7
- 8  
9 2. Figueroa A, Kingsley JD, McMillan V, Panton LB. Resistance Exercise Training  
10 Improves Heart Rate Variability in Women With Fibromyalgia. *Clin Physiol Funct*  
11 *Imaging.* 2008;28:49-54.  
12  
13
- 14  
15 3. de Oliveira FS, de Almeida Silva HJ, de Pontes Oliveira JM, da Silva JFC, Silva  
16 Gomes VL, Fonseca DS, et al. The sophrology as adjuvant therapy may improve the  
17 functionality of patients with fibromyalgia. A pilot randomized controlled trial.  
18 *MTP&RehabJournal.* 2016;14:386.  
19  
20
- 21  
22 4. Heymann ER, Paiva ES, Junior MH, Polak DF, Martinez JE, Proveza JR, et al.  
23 Consenso brasileiro do tratamento da fibromialgia. *Rev bras de reumatol.*  
24 2010;50(1):56-66.  
25  
26
- 27  
28 5. Hoffman DL, Dukes EM. The health status burden of people with fibromyalgia: a  
29 review of studies that assessed health status with the SF-36 or the SF-12. *Int J Clin*  
30 *Pract.* 2008;62(1):115-26.  
31  
32  
33  
34  
35
- 36  
37 6. Talotta R, Bazzichi L, Di Franco M, Casale R, Batticciotto A, Gerardi MC, et al. One  
38 year in review 2017: fibromyalgia. *Clin Exp Rheumatol.* 2017;;35 Suppl 105(3):6-12.  
39 Epub 2017 Jun 28.  
40  
41
- 42  
43 7. Hadlandsmyth K, Dailey DL, Rakel BA, Zimmerman MB, Vance CG, Merriwether  
44 EN, et al. Somatic symptom presentations in women with fibromyalgia are differentially  
45 associated with elevated depression and anxiety. *J Health Psychol.* 2017 Oct  
46 1:1359105317736577. doi: 10.1177/1359105317736577. [Epub ahead of print]  
47  
48
- 49  
50 8. Valim V, Natour J, Xiao Y, Pereira AF, Lopes BB, Pollak DF, et al . Effects of  
51 physical exercise on serum levels of serotonin and its metabolite in fibromyalgia: a  
52 randomized pilot study. *Rev Bras Reumatol.* 2013;53 (6):538-41.  
53  
54
- 55  
56 9. Busch AJ, Barber KAR, Overend TJ, Peloso PMJ, Schachter CL. Exercise for  
57  
58  
59

1  
2  
3 treating fibromyalgia syndrome. Cochrane Database of Systematic Reviews 2007, Issue  
4 3.  
5

6  
7 10. Carville SF, Arendt-Nielsen S, Bliddal H, Blotman F, Branco JC, Buskila D et al.  
8 EULAR evidence-based recommendations for the management of fibromyalgia  
9 syndrome. *Ann Rheum Dis* 2008; 67:536-41.  
10

11  
12  
13 11. Bidonde J, Busch AJ, Webber SC, Schachter CL, Danyliw A, Overend TJ, et al.  
14 Aquatic exercise training for fibromyalgia. *Cochrane Database Syst Rev*. 2014 Oct  
15 28;(10):CD011336. doi: 10.1002/14651858.CD011336.  
16

17  
18  
19 12. Natour J, Cazotti Lde A, Ribeiro LH, Baptista AS, Jones A. Pilates improves pain,  
20 function and quality of life in patients with chronic low back pain: a randomized  
21 controlled trial. *Clin Rehabil*. 2015;29(1):59-68.  
22

23  
24  
25 13. Altan L, Korkmaz N, Bingol U, Gunay B. Effect of pilates training on people with  
26 fibromyalgia syndrome: a pilot study. *Arch Phys Med Rehabil*. 2009;90(12):1983-8.  
27

28  
29  
30 14. Ekici G, Unal E, Akbayrak T, Vardar-Yagli N, Yakut Y, Karabulut E. Effects of  
31 active/passive interventions on pain, anxiety, and quality of life in women with  
32 fibromyalgia: Randomized controlled pilot trial. *Women Health*. 2017;57(1):88-107.  
33

34  
35  
36 15. Wolfe F1, Clauw DJ, Fitzcharles MA, Goldenberg DL, Katz RS, Mease P, et al. The  
37 American College of Rheumatology preliminary diagnostic criteria for fibromyalgia and  
38 measurement of symptom severity. *Arthritis Care Res (Hoboken)*. 2010; 62(5):600-10.  
39

40  
41  
42 16. Farrar JT, Young Jr JP, LaMoreaux L, Werth JL, Poole RM. Clinical importance of  
43 changes in chronic pain intensity measured on an 11-point numerical pain rating scale.  
44 *Pain*. 2001;94(2):149-58.  
45

46  
47  
48 17. Marques AP; Santos AMB; Assumpção A; Matsutani LA; Lage LV; Pereira CAB.  
49 Validação da versão brasileira do fibromialgia impacto questionário (FIQ). *Rev. Bras.*  
50 *Reumatol*. 2006;46 (1): 24-31.  
51

52  
53  
54 18. Podsiadlo D, Richardson S. The timed "Up & Go": a test of basic functional  
55  
56  
57  
58  
59  
60

1  
2  
3 mobility for frail elderly persons. *J Am Geriatr Soc.* 1991;39(2):142-8.  
4  
5

6  
7 19. Bennell K, Dobson F, Hinman R. Measures of physical performance assessments:  
8 Self-Paced Walk Test (SPWT), Stair Climb Test (SCT), Six-Minute Walk Test  
9 (6MWT), Chair Stand Test (CST), Timed Up & Go (TUG), Sock Test, Lift and Carry  
10 Test (LCT), and Car Task. *Arthritis Care Res (Hoboken).* 2011 Nov;63 Suppl 11:S350-  
11 70.  
12  
13

14  
15  
16 20. Bertolazi AN, Fagundes SC, Hoff LS, Dartora EG, Miozzo IC, de Barba ME, et al.  
17 Validation of the Brazilian Portuguese version of the Pittsburgh Sleep Quality Index.  
18 *Sleep Med.* 2011;12(1):70-5.  
19  
20

21  
22 21. Bertolazi AN, Fagundes SC, Hoff LS, Pedro VD, Menna Barreto SS, Johns MW.  
23 Portuguese-language version of the Epworth sleepiness scale: validation for use in  
24 Brazil. *J Bras Pneumol.* 2009 Sep;35(9):877-83.  
25  
26

27  
28 22. Ciconelli RM, Ferraz MB, Santos W, Meinão I, Quaresma MR. Brazilian-Portuguese  
29 version of the SF-36 questionnaire: A reliable and valid quality of life outcome  
30 measure. *Rev. Bras. Reumatol.* 1999; 39, 143–150.  
31  
32

33  
34 23. Gustafsson M, Gaston-Johansson F. Pain intensity and health locus of control: a  
35 comparison of patients with fibromyalgia syndrome and rheumatoid arthritis. *Patient*  
36 *Educ Couns.* 1996;29(2):179–88.  
37  
38

39  
40 24. Morris S, Li Y, Smith JAM, Dube' S, Burbridge C, Symonds T. Multidimensional  
41 daily diary of fatigue-fibromyalgia-17 items (MDF-fibro-17). part 1: development and  
42 content validity. *BMC Musculoskelet Disord.* 2017;18(1):195.  
43  
44

45  
46 25. Brosseau L, Wells GA, Tugwell P, Egan M, Wilson KG, Dubouloz CJ, et al. Ottawa  
47 Panel evidence-based clinical practice guidelines for aerobic fitness exercises in the  
48 management of fibromyalgia: part 1. *Phys Ther.* 2008;88(7):857-71.  
49  
50

51  
52  
53 26. Bidonde J, Busch AJ, Schachter CL, Overend TJ, Kim SY, Góes SM, et al. Aerobic  
54 exercise training for adults with fibromyalgia. *Cochrane Database Syst Rev.* 2017 Jun  
55  
56  
57

1  
2  
3 21;6:CD012700. doi: 10.1002/14651858.CD012700.  
4  
5

6  
7 27. Lima TB, Dias JM, Mazquin BF, da Silva CT, Noqueira RM, Marques AP, et al.  
8 The effectiveness of aquatic physical therapy in the treatment of fibromyalgia: a  
9 systematic review with meta-analysis. *Clin Rehabil.* 2013;27(10):892-908. doi:  
10 10.1177/0269215513484772.  
11  
12

13  
14  
15 28. Assis MR, Silva LE, Alves AM, Pessanha AP, Valim V, Feldman D, et al. A  
16 randomized controlled trial of deep water running: clinical effectiveness of aquatic  
17 exercise to treat fibromyalgia. *Arthritis Rheum.* 2006 Feb 15;55(1):57-65.  
18  
19

20  
21  
22 29. Rivas Neira S, Pasqual Marques A, Pegito Pérez I, Fernández Cervantes R, Vivas  
23 Costa J. Effectiveness of Aquatic Therapy vs Land-based Therapy for Balance and Pain  
24 in Women with Fibromyalgia: a study protocol for a randomised controlled trial. *BMC*  
25 *Musculoskelet Disord.* 2017;19;18(1):22.  
26  
27

28  
29  
30 30. Sanz-Baños Y, Pastor-Mira MÁ, Lledó A, López-Roig S, Peñacoba C, Sánchez-  
31 Meca J. Do women with fibromyalgia adhere to walking for exercise programs to  
32 improve their health? Systematic review and meta-analysis. *Disabil Rehabil.* 2017;7:1-  
33 13.  
34  
35  
36  
37  
38  
39  
40  
41  
42  
43  
44  
45  
46  
47  
48  
49  
50  
51  
52  
53  
54  
55  
56  
57  
58  
59  
60

1  
2  
3  
4  
5  
6  
7  
8  
9  
10  
11  
12  
13  
14  
15  
16  
17  
18  
19  
20  
21  
22  
23  
24  
25  
26  
27  
28  
29  
30  
31  
32  
33  
34  
35  
36  
37  
38  
39  
40  
41  
42  
43  
44  
45  
46  
47  
48  
49  
50  
51  
52  
53  
54  
55  
56  
57  
58  
59  
60

Figure 1: Flow diagram of the study

For peer review only

1  
2  
3  
4  
5  
6  
7  
8  
9  
10  
11  
12  
13  
14  
15  
16  
17  
18  
19  
20  
21  
22  
23  
24  
25  
26  
27  
28  
29  
30  
31  
32  
33  
34  
35  
36  
37  
38  
39  
40  
41  
42  
43  
44  
45  
46  
47  
48  
49  
50  
51  
52  
53  
54  
55  
56  
57  
58  
59  
60

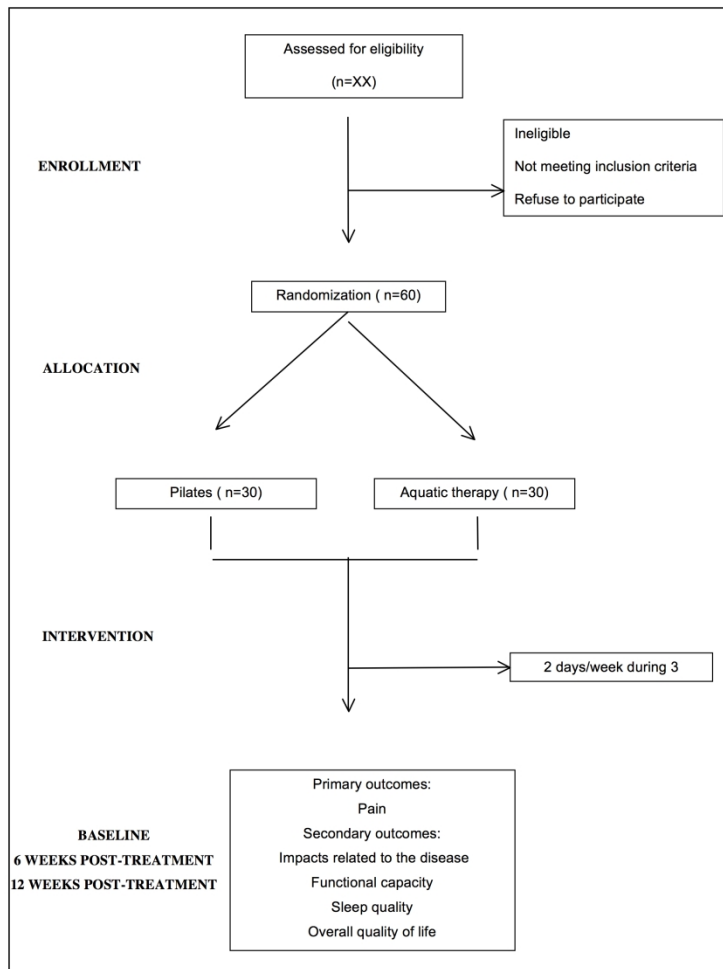

Fig. 1 Flow diagram of the study

Fig. 1 Flow diagram of the study

209x296mm (300 x 300 DPI)

1  
2  
3  
4  
5  
6  
7  
8  
9  
10  
11  
12  
13  
14  
15  
16  
17  
18  
19  
20  
21  
22  
23  
24  
25  
26  
27  
28  
29  
30  
31  
32  
33  
34  
35  
36  
37  
38  
39  
40  
41  
42  
43  
44  
45  
46  
47  
48  
49  
50  
51  
52  
53  
54  
55  
56  
57  
58  
59  
60

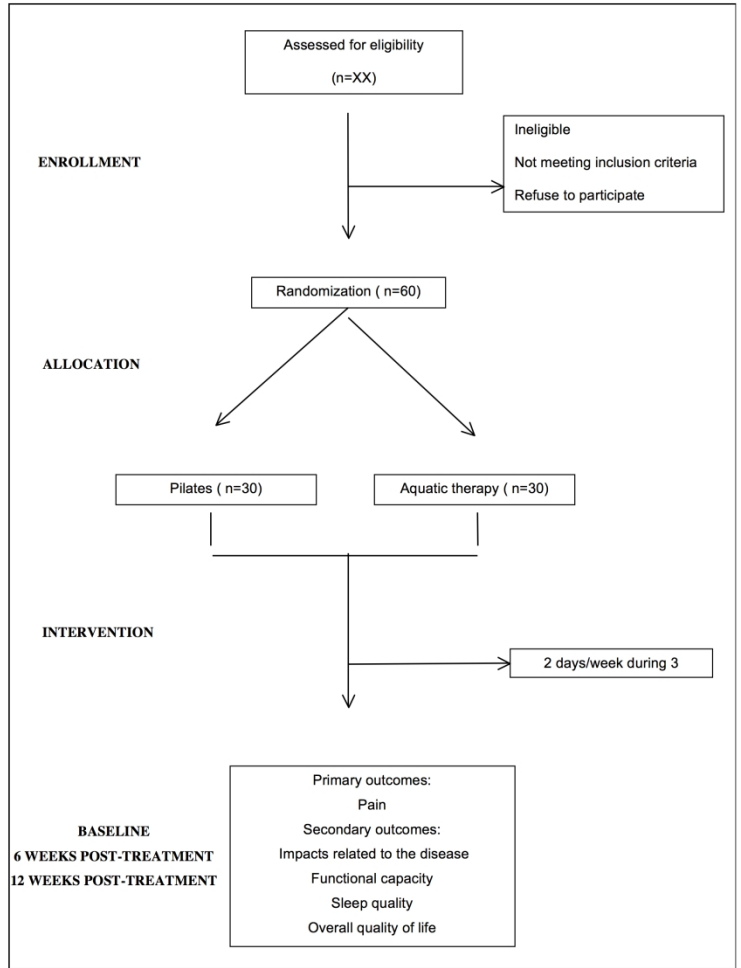

Fig. 1 Flow diagram of the study

Fig. 1 Flow diagram of the study



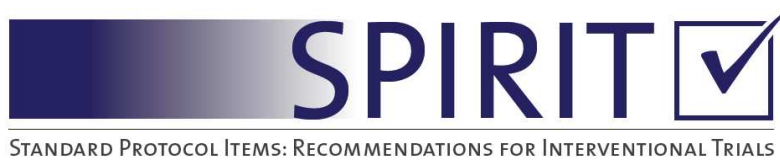

SPIRIT 2013 Checklist: Recommended items to address in a clinical trial protocol and related documents\*

| Section/item                      | Item No | Description                                                                                                                                                                                                                                                                              |
|-----------------------------------|---------|------------------------------------------------------------------------------------------------------------------------------------------------------------------------------------------------------------------------------------------------------------------------------------------|
| <b>Administrative information</b> |         |                                                                                                                                                                                                                                                                                          |
| Title                             | 2       | Descriptive title identifying the study design, population, interventions, and, if applicable, trial acronym                                                                                                                                                                             |
| Trial registration                | 2       | Trial identifier and registry name. If not yet registered, name of intended registry                                                                                                                                                                                                     |
|                                   | N/A     | All items from the World Health Organization Trial Registration Data Set                                                                                                                                                                                                                 |
| Protocol version                  | 8       | Date and version identifier                                                                                                                                                                                                                                                              |
| Funding                           | N/A     | Sources and types of financial, material, and other support                                                                                                                                                                                                                              |
| Roles and responsibilities        | 1       | Names, affiliations, and roles of protocol contributors                                                                                                                                                                                                                                  |
|                                   | 1       | Name and contact information for the trial sponsor                                                                                                                                                                                                                                       |
|                                   | 1       | Role of study sponsor and funders, if any, in study design; collection, management, analysis, and interpretation of data; writing of the report; and the decision to submit the report for publication, including whether they will have ultimate authority over any of these activities |
|                                   | 1       | Composition, roles, and responsibilities of the coordinating centre, steering committee, endpoint adjudication committee, data management team, and other individuals or groups overseeing the trial, if applicable (see Item 21a for data monitoring committee)                         |
| <b>Introduction</b>               |         |                                                                                                                                                                                                                                                                                          |
| Background and rationale          | 3       | Description of research question and justification for undertaking the trial, including summary of relevant studies (published and unpublished) examining benefits and harms for each intervention                                                                                       |
|                                   | 3       | Explanation for choice of comparators                                                                                                                                                                                                                                                    |
| Objectives                        | 5       | Specific objectives or hypotheses                                                                                                                                                                                                                                                        |
| Trial design                      | 5       | Description of trial design including type of trial (eg, parallel group, crossover, factorial, single group), allocation ratio, and framework (eg, superiority, equivalence, noninferiority, exploratory)                                                                                |

1  
2 **Methods: Participants, interventions, and outcomes**

3  
4  
5  
6  
7  
8  
9  
10  
11  
12  
13  
14  
15  
16  
17  
18  
19  
20  
21  
22  
23  
24  
25  
26  
27  
28  
29  
30  
31  
32  
33  
34  
35  
36  
37  
38  
39  
40  
41  
42  
43  
44  
45

|                      |     |                                                                                                                                                                                                                                                                                                                                                                                |
|----------------------|-----|--------------------------------------------------------------------------------------------------------------------------------------------------------------------------------------------------------------------------------------------------------------------------------------------------------------------------------------------------------------------------------|
| Study setting        | 5   | Description of study settings (eg, community clinic, academic hospital) and list of countries where data will be collected. Reference to where list of study sites can be obtained                                                                                                                                                                                             |
| Eligibility criteria | 6   | Inclusion and exclusion criteria for participants. If applicable, eligibility criteria for study centres and individuals who will perform the interventions (eg, surgeons, psychotherapists)                                                                                                                                                                                   |
| Interventions        | 7   | Interventions for each group with sufficient detail to allow replication, including how and when they will be administered                                                                                                                                                                                                                                                     |
|                      | 7   | Criteria for discontinuing or modifying allocated interventions for a given trial participant (eg, drug dose change in response to harms, participant request, or improving/worsening disease)                                                                                                                                                                                 |
|                      | N/A | Strategies to improve adherence to intervention protocols, and any procedures for monitoring adherence (eg, drug tablet return, laboratory tests)                                                                                                                                                                                                                              |
| Outcomes             | N/A | Relevant concomitant care and interventions that are permitted or prohibited during the trial                                                                                                                                                                                                                                                                                  |
|                      | 10  | Primary, secondary, and other outcomes, including the specific measurement variable (eg, systolic blood pressure), analysis metric (eg, change from baseline, final value, time to event), method of aggregation (eg, median, proportion), and time point for each outcome. Explanation of the clinical relevance of chosen efficacy and harm outcomes is strongly recommended |
| Participant timeline | 7   | Time schedule of enrolment, interventions (including any run-ins and washouts), assessments, and visits for participants. A schematic diagram is highly recommended (see Figure)                                                                                                                                                                                               |
| Sample size          | 12  | Estimated number of participants needed to achieve study objectives and how it was determined, including clinical and statistical assumptions supporting any sample size calculations                                                                                                                                                                                          |
| Recruitment          | 7   | Strategies for achieving adequate participant enrolment to reach target sample size                                                                                                                                                                                                                                                                                            |

46 **Methods: Assignment of interventions (for controlled trials)**

47 Allocation:

48  
49  
50  
51  
52  
53  
54  
55  
56  
57  
58  
59  
60

|                     |   |                                                                                                                                                                                                                                                                                                                                                          |
|---------------------|---|----------------------------------------------------------------------------------------------------------------------------------------------------------------------------------------------------------------------------------------------------------------------------------------------------------------------------------------------------------|
| Sequence generation | 6 | Method of generating the allocation sequence (eg, computer-generated random numbers), and list of any factors for stratification. To reduce predictability of a random sequence, details of any planned restriction (eg, blocking) should be provided in a separate document that is unavailable to those who enrol participants or assign interventions |
|---------------------|---|----------------------------------------------------------------------------------------------------------------------------------------------------------------------------------------------------------------------------------------------------------------------------------------------------------------------------------------------------------|

|    |                |     |                                                                         |
|----|----------------|-----|-------------------------------------------------------------------------|
| 1  |                |     |                                                                         |
| 2  | Allocation     | 6   | Mechanism of implementing the allocation sequence (eg, central          |
| 3  | concealment    |     | telephone; sequentially numbered, opaque, sealed envelopes),            |
| 4  | mechanism      |     | describing any steps to conceal the sequence until interventions are    |
| 5  |                |     | assigned                                                                |
| 6  |                |     |                                                                         |
| 7  | Implementation | N/A | Who will generate the allocation sequence, who will enrol participants, |
| 8  |                |     | and who will assign participants to interventions                       |
| 9  |                |     |                                                                         |
| 10 | Blinding       | 6   | Who will be blinded after assignment to interventions (eg, trial        |
| 11 | (masking)      |     | participants, care providers, outcome assessors, data analysts), and    |
| 12 |                |     | how                                                                     |
| 13 |                |     |                                                                         |
| 14 |                | 6   | If blinded, circumstances under which unblinding is permissible, and    |
| 15 |                |     | procedure for revealing a participant's allocated intervention during   |
| 16 |                |     | the trial                                                               |
| 17 |                |     |                                                                         |

### 18 **Methods: Data collection, management, and analysis**

|    |                 |     |                                                                          |
|----|-----------------|-----|--------------------------------------------------------------------------|
| 19 |                 |     |                                                                          |
| 20 | Data collection | 12  | Plans for assessment and collection of outcome, baseline, and other      |
| 21 | methods         |     | trial data, including any related processes to promote data quality (eg, |
| 22 |                 |     | duplicate measurements, training of assessors) and a description of      |
| 23 |                 |     | study instruments (eg, questionnaires, laboratory tests) along with      |
| 24 |                 |     | their reliability and validity, if known. Reference to where data        |
| 25 |                 |     | collection forms can be found, if not in the protocol                    |
| 26 |                 |     |                                                                          |
| 27 |                 |     |                                                                          |
| 28 |                 | 12  | Plans to promote participant retention and complete follow-up,           |
| 29 |                 |     | including list of any outcome data to be collected for participants who  |
| 30 |                 |     | discontinue or deviate from intervention protocols                       |
| 31 |                 |     |                                                                          |
| 32 | Data            | N/A | Plans for data entry, coding, security, and storage, including any       |
| 33 | management      |     | related processes to promote data quality (eg, double data entry;        |
| 34 |                 |     | range checks for data values). Reference to where details of data        |
| 35 |                 |     | management procedures can be found, if not in the protocol               |
| 36 |                 |     |                                                                          |
| 37 | Statistical     | 12  | Statistical methods for analysing primary and secondary outcomes.        |
| 38 | methods         |     | Reference to where other details of the statistical analysis plan can be |
| 39 |                 |     | found, if not in the protocol                                            |
| 40 |                 |     |                                                                          |
| 41 |                 |     |                                                                          |
| 42 |                 | 12  | Methods for any additional analyses (eg, subgroup and adjusted           |
| 43 |                 |     | analyses)                                                                |
| 44 |                 |     |                                                                          |
| 45 |                 | 12  | Definition of analysis population relating to protocol non-adherence     |
| 46 |                 |     | (eg, as randomised analysis), and any statistical methods to handle      |
| 47 |                 |     | missing data (eg, multiple imputation)                                   |
| 48 |                 |     |                                                                          |

### 49 **Methods: Monitoring**

|    |                 |     |                                                                      |
|----|-----------------|-----|----------------------------------------------------------------------|
| 50 |                 |     |                                                                      |
| 51 | Data monitoring | N/A | Composition of data monitoring committee (DMC); summary of its role  |
| 52 |                 |     | and reporting structure; statement of whether it is independent from |
| 53 |                 |     | the sponsor and competing interests; and reference to where further  |
| 54 |                 |     | details about its charter can be found, if not in the protocol.      |
| 55 |                 |     | Alternatively, an explanation of why a DMC is not needed             |
| 56 |                 |     |                                                                      |
| 57 |                 |     |                                                                      |
| 58 |                 |     |                                                                      |
| 59 |                 |     |                                                                      |
| 60 |                 |     |                                                                      |

|    |          |     |                                                                        |
|----|----------|-----|------------------------------------------------------------------------|
| 1  |          | N/A | Description of any interim analyses and stopping guidelines, including |
| 2  |          |     | who will have access to these interim results and make the final       |
| 3  |          |     | decision to terminate the trial                                        |
| 4  |          |     |                                                                        |
| 5  | Harms    | N/A | Plans for collecting, assessing, reporting, and managing solicited and |
| 6  |          |     | spontaneously reported adverse events and other unintended effects     |
| 7  |          |     | of trial interventions or trial conduct                                |
| 8  |          |     |                                                                        |
| 9  |          |     |                                                                        |
| 10 | Auditing | N/A | Frequency and procedures for auditing trial conduct, if any, and       |
| 11 |          |     | whether the process will be independent from investigators and the     |
| 12 |          |     | sponsor                                                                |
| 13 |          |     |                                                                        |

### **Ethics and dissemination**

|    |                               |      |                                                                                                                                                                                                                                                                                     |
|----|-------------------------------|------|-------------------------------------------------------------------------------------------------------------------------------------------------------------------------------------------------------------------------------------------------------------------------------------|
| 14 |                               |      |                                                                                                                                                                                                                                                                                     |
| 15 |                               |      |                                                                                                                                                                                                                                                                                     |
| 16 | Research ethics approval      | 16   | Plans for seeking research ethics committee/institutional review board (REC/IRB) approval                                                                                                                                                                                           |
| 17 |                               |      |                                                                                                                                                                                                                                                                                     |
| 18 |                               |      |                                                                                                                                                                                                                                                                                     |
| 19 | Protocol amendments           | 16   | Plans for communicating important protocol modifications (eg, changes to eligibility criteria, outcomes, analyses) to relevant parties (eg, investigators, REC/IRBs, trial participants, trial registries, journals, regulators)                                                    |
| 20 |                               |      |                                                                                                                                                                                                                                                                                     |
| 21 |                               |      |                                                                                                                                                                                                                                                                                     |
| 22 |                               |      |                                                                                                                                                                                                                                                                                     |
| 23 |                               |      |                                                                                                                                                                                                                                                                                     |
| 24 | Consent or assent             | 16   | Who will obtain informed consent or assent from potential trial participants or authorised surrogates, and how (see Item 32)                                                                                                                                                        |
| 25 |                               |      |                                                                                                                                                                                                                                                                                     |
| 26 |                               |      |                                                                                                                                                                                                                                                                                     |
| 27 |                               | N/A  | Additional consent provisions for collection and use of participant data and biological specimens in ancillary studies, if applicable                                                                                                                                               |
| 28 |                               |      |                                                                                                                                                                                                                                                                                     |
| 29 |                               |      |                                                                                                                                                                                                                                                                                     |
| 30 | Confidentiality               | 16   | How personal information about potential and enrolled participants will be collected, shared, and maintained in order to protect confidentiality before, during, and after the trial                                                                                                |
| 31 |                               |      |                                                                                                                                                                                                                                                                                     |
| 32 |                               |      |                                                                                                                                                                                                                                                                                     |
| 33 |                               |      |                                                                                                                                                                                                                                                                                     |
| 34 |                               |      |                                                                                                                                                                                                                                                                                     |
| 35 | Declaration of interests      | 16   | Financial and other competing interests for principal investigators for the overall trial and each study site                                                                                                                                                                       |
| 36 |                               |      |                                                                                                                                                                                                                                                                                     |
| 37 |                               |      |                                                                                                                                                                                                                                                                                     |
| 38 | Access to data                | N/A  | Statement of who will have access to the final trial dataset, and disclosure of contractual agreements that limit such access for investigators                                                                                                                                     |
| 39 |                               |      |                                                                                                                                                                                                                                                                                     |
| 40 |                               |      |                                                                                                                                                                                                                                                                                     |
| 41 |                               |      |                                                                                                                                                                                                                                                                                     |
| 42 | Ancillary and post-trial care | N./A | Provisions, if any, for ancillary and post-trial care, and for compensation to those who suffer harm from trial participation                                                                                                                                                       |
| 43 |                               |      |                                                                                                                                                                                                                                                                                     |
| 44 |                               |      |                                                                                                                                                                                                                                                                                     |
| 45 | Dissemination policy          | N/A  | Plans for investigators and sponsor to communicate trial results to participants, healthcare professionals, the public, and other relevant groups (eg, via publication, reporting in results databases, or other data sharing arrangements), including any publication restrictions |
| 46 |                               |      |                                                                                                                                                                                                                                                                                     |
| 47 |                               |      |                                                                                                                                                                                                                                                                                     |
| 48 |                               |      |                                                                                                                                                                                                                                                                                     |
| 49 |                               |      |                                                                                                                                                                                                                                                                                     |
| 50 |                               | N/A  | Authorship eligibility guidelines and any intended use of professional writers                                                                                                                                                                                                      |
| 51 |                               |      |                                                                                                                                                                                                                                                                                     |
| 52 |                               |      |                                                                                                                                                                                                                                                                                     |
| 53 |                               | N/A  | Plans, if any, for granting public access to the full protocol, participant-level dataset, and statistical code                                                                                                                                                                     |
| 54 |                               |      |                                                                                                                                                                                                                                                                                     |
| 55 |                               |      |                                                                                                                                                                                                                                                                                     |
| 56 |                               |      |                                                                                                                                                                                                                                                                                     |
| 57 |                               |      |                                                                                                                                                                                                                                                                                     |
| 58 |                               |      |                                                                                                                                                                                                                                                                                     |
| 59 |                               |      |                                                                                                                                                                                                                                                                                     |
| 60 |                               |      |                                                                                                                                                                                                                                                                                     |

## Appendices

|                            |     |                                                                                                                                                                                                |
|----------------------------|-----|------------------------------------------------------------------------------------------------------------------------------------------------------------------------------------------------|
| Informed consent materials | N/A | Model consent form and other related documentation given to participants and authorised surrogates                                                                                             |
| Biological specimens       | N/A | Plans for collection, laboratory evaluation, and storage of biological specimens for genetic or molecular analysis in the current trial and for future use in ancillary studies, if applicable |

---

\*It is strongly recommended that this checklist be read in conjunction with the SPIRIT 2013 Explanation & Elaboration for important clarification on the items. Amendments to the protocol should be tracked and dated. The SPIRIT checklist is copyrighted by the SPIRIT Group under the Creative Commons "[Attribution-NonCommercial-NoDerivs 3.0 Unported](#)" license.

# BMJ Open

## Mat Pilates and aquatic aerobic exercises for women with fibromyalgia. A protocol for a randomized controlled blind study

|                                 |                                                                                                                                                                                                                                                                                                                                                                                                                                                                                                                                                                                                                                                                                            |
|---------------------------------|--------------------------------------------------------------------------------------------------------------------------------------------------------------------------------------------------------------------------------------------------------------------------------------------------------------------------------------------------------------------------------------------------------------------------------------------------------------------------------------------------------------------------------------------------------------------------------------------------------------------------------------------------------------------------------------------|
| Journal:                        | <i>BMJ Open</i>                                                                                                                                                                                                                                                                                                                                                                                                                                                                                                                                                                                                                                                                            |
| Manuscript ID                   | bmjopen-2018-022306.R2                                                                                                                                                                                                                                                                                                                                                                                                                                                                                                                                                                                                                                                                     |
| Article Type:                   | Protocol                                                                                                                                                                                                                                                                                                                                                                                                                                                                                                                                                                                                                                                                                   |
| Date Submitted by the Author:   | 10-Oct-2018                                                                                                                                                                                                                                                                                                                                                                                                                                                                                                                                                                                                                                                                                |
| Complete List of Authors:       | Silva, Hugo Jario de Almeida; Universidade Federal do Rio Grande do Norte, Faculdade de Ciências da Saúde do Trairi<br>Lins, Caio Alano de Almeida; Universidade Federal do Rio Grande do Norte, Faculdade de Ciências da Saúde do Trairi<br>Nobre, Thaiza Teixeira Xavier ; Universidade Federal do Rio Grande do Norte, Faculdade de Ciências da Saúde do Trairi<br>de Sousa, Vanessa Patrícia Soares ; Universidade Federal do Rio Grande do Norte, Faculdade de Ciências da Saúde do Trairi<br>Caldas, Renata Trajano Jorge ; Faculdade Santa Terezinha, Fisioterapia de Souza, Marcelo Cardoso; Universidade Federal do Rio Grande do Norte, Faculdade de Ciências da Saúde do Trairi |
| <b>Primary Subject Heading</b>: | Rehabilitation medicine                                                                                                                                                                                                                                                                                                                                                                                                                                                                                                                                                                                                                                                                    |
| Secondary Subject Heading:      | Rheumatology                                                                                                                                                                                                                                                                                                                                                                                                                                                                                                                                                                                                                                                                               |
| Keywords:                       | fibromyalgia, Pilates, aquatic aerobic excises, Chronic pain                                                                                                                                                                                                                                                                                                                                                                                                                                                                                                                                                                                                                               |
|                                 |                                                                                                                                                                                                                                                                                                                                                                                                                                                                                                                                                                                                                                                                                            |

SCHOLARONE™  
Manuscripts

1  
2  
3 **Mat Pilates and aquatic aerobic exercises for women with fibromyalgia. A protocol**  
4 **for a randomized controlled blind study**  
5  
6  
7

8 Hugo Jario de Almeida Silva<sup>1</sup>, Caio Alano de Almeida Lins<sup>2</sup>, Thaiza Teixeira Xavier  
9 Nobre<sup>2</sup>, Vanessa Patrícia Soares de Sousa<sup>2</sup>, Renata Trajano Jorge Caldas<sup>3</sup>, Marcelo  
10 Cardoso de Souza<sup>2\*</sup>  
11  
12  
13  
14  
15  
16  
17

- 18 1- PT, MSc student. Federal University of Rio Grande do Norte, Faculty of Health  
19 Sciences of Trairi – UFRN/FACISA, Santa Cruz, RN – Brazil.  
20  
21 2- PT, PhD. Professor of Physiotherapy Course – Federal University of Rio Grande  
22 do Norte, Faculty of Health Sciences of Trairi – UFRN/FACISA, Santa Cruz, RN  
23 – Brazil.  
24  
25 3- PT, PhD. Professor of Faculdade Santa Terezinha – CEST, Physiotherapy Course. São Luís, MA - Brazil.  
26  
27  
28  
29

30 \*Corresponding author:  
31  
32

33 Prof. Marcelo Cardoso de Souza, PT, PhD.  
34 Federal University of Rio Grande do Norte - Faculty of Health Sciences of Trairi  
35 (UFRN/FACISA)  
36 Master's Program in Collective Health UFRN/FACISA.  
37 Master's Program in Rehabilitation Sciences UFRN/FACISA.  
38 Barão do Rio Branco Avenue, 435, Centro, Santa Cruz, Rio Grande do Norte,  
39 Brazil.  
40 Zip code: 59200-000  
41 Phone: +55 (84) 3291.2411  
42 Email: marcellogv@hotmail.com  
43  
44  
45  
46  
47  
48  
49  
50  
51  
52  
53  
54  
55  
56  
57  
58  
59  
60

**Abstract**

1  
2  
3 **Introduction:** Physical exercises have been recommended to improve overall well-being  
4 in patients with fibromyalgia, with the main objective to repair the effects of lack of  
5 physical conditioning and to improve symptoms, especially pain and fatigue. Although  
6 widely recommended and widely known, few studies support the use of the Pilates  
7 method as effective for improving the symptoms of the disease, comparing it with other  
8 well-founded exercise modalities. This protocol was developed to describe the design of  
9 a randomized controlled study with a blind evaluator that evaluates the effectiveness of  
10 the mat Pilates method in comparing it with aquatic aerobic exercises for improving pain  
11 in women with fibromyalgia.

12  
13  
14  
15  
16  
17  
18 **Methods:** Sixty (60) women aged 18 to 60 years with fibromyalgia diagnosis, a score of  
19 between 3 and 8 points on the visual analog scale for pain, and who sign the clear and  
20 informed consent form will be recruited according to the inclusion criteria. They will be  
21 randomized into one of the two intervention groups: (i) Pilates, to perform an exercise  
22 program based on the Mat Pilates method; and (ii) aquatic exercise, to participate in a  
23 program of aerobic exercises in the swimming pool. The protocol will correspond to 12  
24 weeks of treatment, with both groups performing the exercises with supervision twice a  
25 week. The primary outcome will be pain (Visual Analogue Scale for pain). Secondary  
26 outcomes are to include impacts related to the disease, functional capacity, sleep quality  
27 and overall quality of life. The evaluations will be performed at three moments: baseline,  
28 after 6 weeks and 12 weeks of treatment.

29  
30  
31  
32  
33  
34  
35  
36  
37 **Ethics and dissemination:** This protocol has been approved by Ethics Committee of  
38 FACISA/UFRN (Number: 2.116.314). Data collection will begin after approval by the  
39 ethics committee. There will be prior contact with the women, at which time all the  
40 information about the study and objectives will be presented, as well as resolution No.  
41 466/2012 of the National Health Council of Brazil of the year 2012, which provides  
42 guidelines and regulatory standards for research involving human beings. Participants  
43 must sign the informed consent form before the study begins.

44  
45  
46  
47  
48  
49 **Trial registrations:** ClinicalTrials.gov Identifier (NCT03149198), May 11, 2017.

50  
51  
52  
53  
54  
55  
56  
57  
58  
59  
60 **Keywords:** Chronic pain, therapeutic exercise, aerobic exercise, Pilates, fibromyalgia  
treatment.



### Strengths and limitations of this study

- This is a pioneering study for evaluating the effectiveness of the Mat Pilates method in comparing it with aquatic aerobic exercises with a follow-up of 12 weeks.
- In addition, implementation of the protocol in question may contribute to elucidate the effects of the Mat Pilates method in women with fibromyalgia, as well as the frequency and adequate duration of exercise to improve symptoms.
- It is important to compare an exercise mode known as pilates with another type of exercise, namely aerobic exercise, this time performed in the water, as little evidence of high quality for its use exists.
- It is necessary that new exercise interventions for fibromyalgia be tested and compared so that they can be recommended based on evidence.
- It is difficult to perform a double-blind study with exercises, since the participant knows what exercise is performing.

### Background

Fibromyalgia (FM) is a syndrome characterized by generalized chronic pain and sleep disturbance, fatigue, reduced muscle strength, depression, anxiety, mood disorders, irritable bowel and other symptoms that negatively impact quality of life [1-3]. The prevalence of FM ranges from 0.66 to 4.4% being more frequent in women than in men, in the proportion of 8 to 1, especially in the age group between 35 and 60 years. In Brazil, FM was considered the second most frequent rheumatic disease in outpatient clinics after osteoarthritis [4].

The causes for the onset of this syndrome have not yet been fully elucidated. However, recent scientific research suggests that changes in the metabolism and regulation of certain substances of the central nervous system such as serotonin and noradrenaline can trigger the disease [5].

With a controversial etiopathogenesis, the cause of FM is associated with genetic, environmental and neuromodulatory factors [6]. Many patients with FM have high levels of stress and feelings of depression, anxiety and frustration [7]. Patients feel fatigue and

1  
2  
3 physical tiredness with a loss of energy, and decreased strength when performing physical  
4 exercises. This fatigue causes a great decrease in quality of life and often prevents  
5 performing activities of daily living, thereby reducing productivity in the work  
6 environment.  
7  
8  
9

10 Therefore, physical exercises have been recommended to improve the overall  
11 well-being in women with FM, with the main purpose of repairing the effects of a lack of  
12 physical conditioning and improving the symptoms, especially pain and fatigue. Valim et  
13 al. (2013) report that physical exercises in FM are beneficial, low-cost and promote  
14 improvement in pain and other symptoms of the disease [8].  
15  
16  
17

18 The importance of physical exercise for women with FM is already well described  
19 in the literature, in addition to it being a low-cost, safe and efficient intervention as a form  
20 of treatment. Exercises have also been shown to be effective in reducing pain and the  
21 number of painful points, improving quality of life, mood and other psychological  
22 aspects. Although studies show benefits in almost all exercise modalities, further  
23 evidence supports the practice of aerobic training [9,10]. Within this perspective, a  
24 Cochrane review on aquatic exercises for FM showed that aquatic exercises are effective  
25 in improving physical well-being, functional capacity, pain, a 37% improvement in  
26 muscular strength and improvement in cardiovascular capacity [11].  
27  
28  
29  
30  
31  
32  
33

34 For some while the Pilates method of exercising has been gaining popularity,  
35 being considered one more exercise modality that can be used. This method developed  
36 by Joseph H. Pilates includes stretching and strengthening exercises with controlled and  
37 precise movements that can use special equipment or even on the ground. The purpose of  
38 physical training using the Pilates method is to improve body functioning based on core  
39 strengthening, a term that refers to the center of the trunk supporting the body (rectus  
40 abdominus, transverse abdomen, erector spine, diaphragm, and pelvic floor muscles) .  
41 The six basic principles of the method are: centralization, concentration, control,  
42 precision, respiration, and flow [12].  
43  
44  
45  
46  
47  
48  
49  
50

51 Although highly recommended and widely known, few studies have evaluated the  
52 effects of the method for the treatment of women with FM. In addition, these studies  
53 present several methodological flaws that compromise their results and suggest that  
54 studies with better methodological design should be conducted with the objective of  
55 observing the effectiveness of the Pilates method in treating these patients [13,14].  
56 Therefore, the main objective of this study is to evaluate the effectiveness of the Mat  
57  
58  
59  
60

Pilates method in improving pain in women with FM, and comparing it with aquatic aerobic exercises. Our hypothesis is that the Mat Pilates method can also bring benefits for improving pain in women with FM, similar to aquatic aerobic exercises. The secondary objectives of the study are to compare the impact of disease, functionality and performance, sleep quality and quality of life in women with FM who perform two different modalities of exercise.

## Methods

### Design

Study protocol for a randomized controlled parallel group single-blind trial. This study has been registered (ClinicalTrials.gov Identifier: NCT03149198). Participants will be randomized to perform mat Pilates or aerobic exercises. Allocation to either group (Mat pilates or aquatic aerobic exercises) will be achieved through a computer-generated sequence of random numbers. The allocation sequence will be created and carried out by a non-interventionist researcher in charge of telephone screening and handling the data obtained in the various assessment sessions.

Figure 1 shows a flowchart of the progress of the various stages of this test. This study was approved by the Ethics Committee of Federal University of Rio Grande do Norte, Faculty of Health Sciences of Trairi – (FACISA/UFRN) (Number: 2.116.314).

### Participants

Sixty (60) women aged 18 to 60 years, with a clinical diagnosis of FM according to the criteria of the American College of Rheumatology [15] and scoring between 3 and 8 points on the visual analogue pain scale will be recruited, provided they give their consent after being informed of the study's objectives and procedures. The volunteers will be recruited from the waiting list of patients of the Physiotherapy School Clinic of FACISA/UFRN; in addition, the project will also be announced by radio and local media. After this, a telephone contact will first be made to clarify any questions from the participants, and the first screening for inclusion will be carried out.

Personal data of the participants will be numerically coded and stored in a database, which can only be accessed by the researcher responsible for the randomization and blinding process. Informed consent as well as all study information will be passed on

1  
2  
3 to all participants. Prior to any data collection, participants must sign the clear and  
4 informed consent form.  
5  
6  
7

#### 8 Inclusion criteria:

- 9 - Women diagnosed with FM according to the American College of Rheumatology
- 10 classification criteria.
- 11 - Aged between 18 and 60 years.
- 12 - Reporting pain between 3 and 8 on the VAS.
- 13
- 14
- 15
- 16
- 17

#### 18 Exclusion Criteria:

- 19 - uncontrolled hypertension
- 20 - decompensated cardiorespiratory disease
- 21 - history of syncopes or arrhythmias induced by physical exercise
- 22 - decompensated diabetes
- 23 - serious psychiatric illness
- 24 - Primarily Systemic Exertion Intolerance Disease
- 25 - thyroid issues
- 26 - obesity
- 27 - history of regular exercise (at least 2 times a week) in the last 6 months
- 28 - any other condition that makes it impossible for the patient to perform physical
- 29 exercises.
- 30
- 31
- 32
- 33
- 34
- 35
- 36
- 37
- 38
- 39
- 40

#### 41 Research team

42 This study will involve 5 researchers; 1 researcher responsible for the evaluations;  
43 2 researchers responsible for the interventions (1 for each group); 1 researcher responsible  
44 for the interview, initial screening and randomization of participants, and 1 researcher  
45 who will perform the statistical analysis.  
46  
47  
48  
49  
50  
51

#### 52 Patient and Public Involvement

53 The main question of the study was developed to answer a gap in the literature on  
54 the comparison of different physical exercise modalities for treating fibromyalgia,  
55 although no participant in the study has been involved so far. The results will be  
56  
57  
58  
59  
60

1  
2  
3 disseminated to the participants in the form of a lecture and fellowship at the end of the  
4 study, presenting the effects found in the studied variables. If one modality is proven to  
5 be superior over the other, it will be offered and guaranteed to the participants.  
6  
7  
8  
9

## 10 Randomization and blinding

11  
12  
13 Participants who are successfully approved for screening and who agree to sign  
14 the free and informed consent form will receive a number in a randomization table  
15 according to the inclusion order in the study. These numbers will correspond to the Pilates  
16 group or aquatic exercise group in which volunteers will be included. This distribution  
17 will be performed randomly through the website *randomization.com*. The allocation will  
18 be concealed using sealed and opaque envelopes, numbered consecutively. An  
19 independent researcher who will not participate in the other study procedures will perform  
20 the randomization process. The flow diagram of the study is summarised in Fig. 1.  
21  
22  
23

24 The researchers responsible for interventions will be blinded to the participants'  
25 initial assessments, and the researcher responsible for evaluations will not know the group  
26 of each participant.  
27  
28

29 In addition, data collected during participant evaluations will not be revealed to  
30 the researchers responsible for interventions, and participants will be instructed not to  
31 disclose their experience and information related to the intervention.  
32  
33

34 Finally, the researcher responsible for statistical analysis will be blinded. Once the  
35 intervention is completed, he/she will receive an Excel data table with all necessary data  
36 without identification of the subjects or the groups.  
37  
38  
39  
40  
41  
42  
43

## 44 Interventions

45 Participants in this study will receive 24 treatment sessions (two per week) for 12  
46 weeks. Evaluations will be performed prior to the start of treatment, after 12 sessions and  
47 after 24 treatment sessions.  
48  
49

### 50 Mat Pilates Exercise Program

51 The exercise program based on the Pilates method will be carried out on a mat, in  
52 the Group Room of the Clinic School of Physiotherapy of the *UFRN/FACISA* in Santa  
53 Cruz, RN, Brazil. The room has ample space and air conditioning for better patient  
54 accommodation. The exercises will be performed twice a week for 12 weeks. Each  
55 session will last about 50 minutes and will be supervised by an experienced Mat Pilates  
56  
57  
58  
59  
60

researcher who will be responsible for the intervention in this group. Table 1 shows the progression of the exercises according to the time. A total of 10 exercises will be performed, which are presented in Table 2.

Table 1: Exercise progression according to the intervention time

| Period                                                     | Dose                     |
|------------------------------------------------------------|--------------------------|
| First month (1 <sup>st</sup> to 8 <sup>th</sup> session)   | 1 set of 8 repetitions   |
| Second month (8 <sup>th</sup> to 16 <sup>th</sup> session) | 2 sets of 10 repetitions |
| Third month (16 <sup>th</sup> to 24 <sup>th</sup> session) | 3 sets of 8 repetitions  |

#### Intervention group exercise program

Table 2: Mat Pilates Group Exercise Program

| <u>NAME OF THE EXERCISE</u>                                                                                    | <u>DESCRIPTION</u>                                                                                                                                                                                                                                                   |
|----------------------------------------------------------------------------------------------------------------|----------------------------------------------------------------------------------------------------------------------------------------------------------------------------------------------------------------------------------------------------------------------|
| 1 - SWAN<br>Stretches the anterior trunk chain.<br>Strengthens pectoral, triceps and anterior deltoid muscles. | 1 – Lying in the prone position, hands resting in the direction of the shoulders.<br>2 – Extend the elbows, keeping head aligned with spine, extending/stretching the trunk.<br>3 – Return to the initial position.                                                  |
| 2 – ONE LEG UP-DOWN<br>Strengthens the rectus femoris, iliopsoas and sartorius muscles.                        | 1 – Lying in the supine position, arms outstretched alongside the body.<br>2 – Raise leg in extension with feet in plantar flexion.<br>3 – Return to the initial position.                                                                                           |
| 3 – LEG CIRCLES<br>Strengthens the rectus femoris, sartorius, adductor, gluteus medius muscles.                | 1 – Lying in the supine position, arms outstretched alongside the body and supported on the ground.<br>2 – Raise leg in extension, with feet in plantar flexion.<br>3 – Make circles with the leg.                                                                   |
| 4 – SINGLE LEG STRETCH<br>Strengthens the abdomen, stretches the glutes and the lumbar spine.                  | 1 – Lying in the supine position, flex the right leg by placing the left hand on the right knee and the right hand on the right ankle, flexing as much as possible toward the chest. The left leg will be extended at an angle of 30°.<br>2 – Slowly switch the leg. |
| 5 – SAW<br>Stretches trunk rotators, the hamstrings and the quadratus lumborum muscle.                         | 1 – Sitting with the back straight and legs apart at hip width, arms extended and apart at shoulder height.                                                                                                                                                          |

|                                                                                                                                                                                                        |                                                                                                                                                                                                                                                                                             |
|--------------------------------------------------------------------------------------------------------------------------------------------------------------------------------------------------------|---------------------------------------------------------------------------------------------------------------------------------------------------------------------------------------------------------------------------------------------------------------------------------------------|
| <p>Strengthens the rectus abdominis, external and internal oblique muscles.</p>                                                                                                                        | <p>2 – Slowly from the waist, twist the spine to the left.</p> <p>3 – Move the right arm toward the left foot and the left arm back at shoulder height.</p> <p>4 – Return to the initial position and switch sides.</p>                                                                     |
| <p>6 – SIDE KICKS: FRONT AND BACK</p> <p>Strengthens the rectus femoris, iliopsoas, sartorius, gluteus medius, gluteus maximus and abdominal muscles in isometry.</p>                                  | <p>1 – Lying straight in lateral decubitus, arm flexed and hand resting under the head.</p> <p>2 – Keep your upper leg aligned with your hips and slowly bring the extended leg forward.</p> <p>3 – Return to the initial position.</p>                                                     |
| <p>7 – THE HUNDRED</p> <p>Strengthens the abdominal, oblique, transverse and rectus femoris muscles.</p>                                                                                               | <p>1 – Lying in the supine position, elbow extended with the shoulder, hips and knees at 90°.</p> <p>2 – Knee extension at approximately 45°. Slight bending of the trunk (removing the shoulder blades from the mat) and chin toward chest.</p> <p>3 – Return to the initial position.</p> |
| <p>8 – PELVIC LIFT ON THE BALL</p> <p>Strengthens the gluteus maximus, biceps femoris, semitendinosus, semimembranosus, gastrocnemius, and quadriceps femoris muscles.</p> <p>Mobilizes the spine.</p> | <p>1 – Lying in the supine position, legs flexed at 90°, with heels on the ball.</p> <p>2 - Raise the hips from the mat, extending the legs.</p> <p>3 – Return to the initial position.</p>                                                                                                 |
| <p>9 – SIT-UPS ON THE BALL</p> <p>Strengthens rectus abdominis and external oblique muscles.</p>                                                                                                       | <p>1 – Lying in the supine position holding the ball over the head and legs at a 45°.</p> <p>2 – Bring the ball toward the legs and hold it.</p> <p>3 – Return to the initial position.</p>                                                                                                 |
| <p>10 – STRETCHING ON THE BALL</p> <p>Stretching and muscle relaxation.</p>                                                                                                                            | <p>1 – Lying in lateral, ventral and dorsal decubitus on the ball.</p>                                                                                                                                                                                                                      |

### Aquatic Aerobic Exercise Program

The aerobic exercise program will be carried out at the therapeutic swimming pool of the Physiotherapy School Clinic at the *FACISA/UFRN* in Santa Cruz, RN. The pool is heated (30°C), which provides better effects to the proposed treatment.

The exercises will be performed twice a week for 12 weeks. Each session will last about 50 minutes and will be supervised by an experienced researcher responsible for the intervention in this group.

Patients will always be instructed to perform the exercise according to their current conditioning and increase the intensity according to their perception of exertion (Borg scale). The program is best described in Table 3.

Table 3: Aquatic aerobic exercises group exercise program.

| <u>TIME</u>                         | <u>EXERCISE</u>                                                                                                                                                                                                                                                                                                                                                                    |
|-------------------------------------|------------------------------------------------------------------------------------------------------------------------------------------------------------------------------------------------------------------------------------------------------------------------------------------------------------------------------------------------------------------------------------|
| 5 min – Warm-up.                    | 1 - Walking in a clockwise circle at a slow pace.<br>2 - Walking in a counterclockwise circle at a slow pace.<br>3 - Walking with abduction/adduction in the horizontal plane of the upper limbs at a fast pace.<br>4 - Walking with knee flexion and alternating hip flexion and hand on opposite knee at a fast pace.                                                            |
| 30 min – Aquatic aerobic exercises. | 1 - Rapid tiptoe walking (2 laps in the pool)<br>2 - Fast walking on the heels (2 laps in the pool).<br>3 - Quick lateral marching (2 laps in the pool).<br>4 - Circles against the turbulent water flow.<br>5 - Rhythmic waist circles using pool noodles and floaters.<br>6 - Rhythmic movement of upper and lower limbs.                                                        |
| 5 min – Cool-down.                  | 1 - Walking in a clockwise circle at a slow pace.<br>2 - Walking in a counterclockwise circle at a slow pace.<br>3 - Walking with abduction/adduction in the horizontal plane of the upper limbs at a slow pace.<br>4 - Walking with knee flexion and alternating hip flexion and hand on the opposite knee at a slow pace.<br>5 - Respiratory exercises of diaphragmatic pattern. |

### Evaluations

During the baseline measurement, the following descriptive characteristics will be collected: gender, age, weight, height, current occupation. The chronology of the evaluation of the primary and secondary outcome measures is shown in Table 4.

### Primary outcome measures



1  
2  
3 The Visual Analogue Scale (VAS) for pain is the main result of this study and will  
4 be used for the intensity of pain. Participants should mark the intensity of their pain in the  
5 VAS that consists of a horizontal line 100 mm long, where 0 means "no pain" and 10  
6 "worst pain imaginable", where the participant reports the most intense pain episode  
7 during the daily activities. The difference considered clinically significant for  
8 improvement in pain is change in the scale by 2.5 cm [16].  
9  
10  
11  
12  
13  
14

### 15 Secondary outcome measures

- 16  
17  
18  
19 1. Impact related to the disease: the evaluation will be performed using the FIQ  
20 (*Fibromyalgia Impact Questionnaire*), a questionnaire that assesses anxiety,  
21 depression and physical performance in FM. The translated version adapted for  
22 the Brazilian population will be used [17].  
23  
24
- 25 2. Functional capacity:
  - 26  
27 • “*Timed Up and Go test*” (TUG), a functional test consisting of getting up from  
28 a chair without the aid of the arms, walking a distance of three meters, turning  
29 around and walking back. At the start of the test, the patient should have his  
30 or her back resting on the back of the chair. The patient then receives the “go”  
31 command to perform the test and they are timed from the command voice until  
32 the moment they rest their back on the chair again [18,19].  
33  
34 • *Six-minute Walk Test* (6MWT), to measure the walking performance of  
35 patients. The test will be performed on a 20-meter marked gymnasium track  
36 away from other people. The patients will be instructed to walk the entire  
37 distance, being able to interrupt the test if they do not feel able to continue  
38 [19].  
39  
40
- 41 3. Assessment of sleep quality:
  - 42  
43 • *Pittsburgh Sleep Quality Index* – the Brazilian Portuguese version (PSQI-BR)  
44 will be used to evaluate the subjective quality of sleep. This questionnaire  
45 consists of nineteen items grouped into seven components, which are scored  
46 on a scale from 0 to 3. The components are: (1) subjective quality of sleep; (2)  
47 sleep latency; (3) duration of sleep; (4) habitual sleep efficiency; (5) sleep  
48 disorders; (6) use of medication for sleep; and (7) daytime dysfunction. The  
49 values corresponding to respondents’ responses for each component are  
50 summed up to give an overall PSQI score, which ranges from 0 to 21. Scores  
51  
52  
53  
54  
55  
56  
57  
58  
59  
60

between 0-4 indicate good sleep quality, while 5-10 scores indicate poor quality, and above 10 indicate sleep disturbance [20].

- *Epworth Sleepiness Scale* version in Brazilian Portuguese (ESS-BR) will be used to measure the possibility of dozing off. The questionnaire consists of eight daily situations where the probability of dozing off is graded on a scale from zero (no probability of dozing off) to three (very likely to doze off). At the end, the scores are summed up to generate a total score ranging from 0-24, where an individual above 10 points is characterized with excessive drowsiness [21].
4. Overall quality of life: will be assessed by the *Short Form-36 Health Survey*, a quality of life questionnaire, translated into Portuguese, containing 36 questions. The result is given in 8 domains: physical functioning, role physical, role emotional, bodily pain, vitality, mental health, social functioning, and general health, with scores ranging from 0-100 in each domain, in which 100 is the best health state and 0 the worst health state [22].

Table 4 Chronology of primary and secondary outcome measures

| Results          | baseline | 6 week | 12 week |
|------------------|----------|--------|---------|
| <i>Primary</i>   |          |        |         |
| VAS              | ✓        | ✓      | ✓       |
| <i>Secondary</i> |          |        |         |
| FIQ              | ✓        | ✓      | ✓       |
| TUG              | ✓        | ✓      | ✓       |
| 6MWT             | ✓        | ✓      | ✓       |
| PSQI-BR          | ✓        | ✓      | ✓       |
| ESS-BR           | ✓        | ✓      | ✓       |
| SF-36            | ✓        | ✓      | ✓       |

VAS= *Visual Analogue Scale* for pain, FIQ= *Fibromyalgia Impact Questionnaire*, TUG= *Timed Up and Go test*, 6MWT= *Six-minute Walk Test*, PSQI-BR= *Pittsburgh Sleep Quality Index* – the Brazilian Portuguese version, ESS-BR= *Epworth Sleepiness Scale* version in Brazilian Portuguese, SF-36= *Short Form-36 Health Survey*.

#### Training of researchers

1  
2  
3 A series of training stages prior to starting the study will be implemented for the  
4 assessment and treatment intending to protocolize the actions carried out in the study. In  
5 these training stages, treatment techniques and measuring will be practiced in order to  
6 reach a consensus among the involved researchers.  
7  
8  
9

## 10 11 Statistical issues

### 12 13 *Sample size calculation*

14  
15 The sample size was calculated based on the pain variable in order to find a  
16 difference of  $\pm 2.5$  points between the intervention groups on the visual analog pain scale  
17 - VAS [16], with a standard deviation of 2.5 points [23]. A sample of 60 participants is  
18 required (30 in each group) in order to achieve a statistical power of 90% with a 5% alpha,  
19 and considering a loss rate of 20%. The sample calculation was performed for the  
20 ANOVA repeated measures statistical test with interaction between groups. Gpower3.1  
21 software was used for the calculation.  
22  
23  
24  
25  
26  
27  
28

### 29 30 *Statistical analysis*

31 The analysis will be descriptive for all outcomes included in the study, expressing  
32 quantitative outcomes with their mean  $\pm$  standard deviation and qualitative outcomes with  
33 their absolute value, percentage and 95% confidence intervals.  
34  
35

36 Data will be analyzed by SPSS software. The chi-square test will be used to  
37 observe associations between the qualitative variables. After observing the normal  
38 distribution and homogeneity of the variances of the quantitative variables by means of  
39 the Kolmogorov-Smirnov test and the Levene test, respectively, the Student's t-test (for  
40 variables with normal distribution) or the Mann-Whitney test (for variables with a non-  
41 normal distribution) will be used to perform a comparison of the means. Estimates of  
42 average effect (differences between groups) for all variables will be calculated using the  
43 ANOVA mixed model. This analysis model incorporated the intervention groups (Pilates  
44 and aquatic exercise), time (baseline, 6 weeks and 12 weeks) and the group  $\times$  time  
45 interaction. When a significant F value is found, the Bonferroni post-hoc test will be  
46 applied in order to identify the differences. An intention-to-treat analysis will be used to  
47 assess the response to intervention, with the last evaluation carried forward when  
48 necessary. The size of the effect between the groups for the variables that present  
49 intergroup differences can be calculated at some point, with a respective 95% confidence  
50  
51  
52  
53  
54  
55  
56  
57  
58  
59  
60

1  
2  
3 interval. The level of statistical significance adopted will be 5%. The analysis will be  
4 performed by an independent researcher.  
5  
6  
7

## 8 **Discussion**

9  
10 This protocol will be carried out for a randomized single-blind clinical trial, in  
11 order to investigate whether mat Pilates produces similar beneficial effects to aquatic  
12 aerobic exercises in reducing pain and disability in women with FM. Secondary outcomes  
13 are to include impacts related to the disease, functional capacity, sleep quality and overall  
14 quality of life. With the conclusion of the study, we hope to test the following null  
15 hypothesis: “There is no difference in pain and disability for participants undergoing  
16 treatment with Mat Pilates or with aquatic aerobic exercises”.  
17  
18  
19  
20  
21

22 Women with FM experience fatigue [24] and physical tiredness, with loss of  
23 energy, and decreased power/strength when performing physical exercises. Fatigue leads  
24 to a great decrease in quality of life and often prevents performance of activities of daily  
25 living, thereby reducing productivity in the workplace. Thus, physical exercises, and  
26 especially aerobic ones [25], have been recommended to improve overall well-being in  
27 women with FM, with the main purpose of repairing the effects of a lack of physical  
28 conditioning, and especially improving symptoms regarding pain and fatigue.  
29  
30  
31  
32  
33

34 A recent Cochrane review on aerobic exercise in fibromyalgia concluded that  
35 moderate quality evidence exists indicating that aerobic exercise is likely to improve  
36 quality of life when compared to control, and poor quality evidence suggests that aerobic  
37 exercise may slightly decrease pain intensity, slightly improve physical function, and lead  
38 to a slight difference in fatigue and stiffness [26].  
39  
40  
41  
42

43 Regarding aquatic aerobic exercises, a meta-analysis [27] found good results for  
44 aquatic therapy (hydrotherapy) with a duration of over 20 weeks; however, in our study  
45 we will use aquatic exercises with an aerobic purpose, rather than just aquatic  
46 physiotherapy. *Deep water running* is an aquatic aerobic conditioning technique that has  
47 shown to be as beneficial as aerobic exercise on land, however with advantages related to  
48 emotional aspects in women with fibromyalgia [28]. A systematic review carried out by  
49 Bidonde et al. (2014) concluded that the evidence of low to moderate quality in relation  
50 to the control suggests that aquatic training is beneficial for improving well-being,  
51 symptoms and fitness in adults with fibromyalgia. Low quality evidence suggests that  
52 there are benefits of aquatic and land exercise, except for muscle strength (low quality  
53  
54  
55  
56  
57  
58  
59  
60

evidence favoring land exercises) and also that no serious adverse effects were found [11].

A recent protocol on aquatic exercise *versus* land exercises to treat balance and pain in women with fibromyalgia was published, showing the interest of the researchers in deepening knowledge on the subject, since more well-designed studies are still necessary. However, our aquatic aerobic exercise program differs from the one used in this study due to the fact that it has the objective of working on more aspects related to balance and proprioception in water [29]. The Pilates method is currently well known and highly recommended by doctors and health professionals with the aim of improving pain, posture, stretching and strengthening of the body as a whole. Women with FM are frequently recommended to perform physical exercises to improve the FM symptoms, in which Pilates represents an important option to be considered. However, few studies have evaluated the effects of the method for the treatment of women with FM. In addition, these studies present several methodological flaws that compromise their results, suggesting that studies with better methodological design should be conducted with the objective of observing the effectiveness of the Pilates method in treating these women [13,14].

Adherence to treatment is something very important to be reported, mainly in interventions for chronic musculoskeletal disorders [30]. We hope that the volunteers in our study will have good adherence to treatment, considering that the heated pool is a stimulating invitation for relaxation and that Pilates is a popular, famous and still relatively high-cost technique in our reality, thus we believe that our intervention will be well accepted.

In view of the above, we hope that the conclusion of this study contributes to scientific knowledge, providing subsidies for the use of physiotherapy as a safe and effective tool in treating women with FM, as well as to help elucidate the best frequency and the adequate duration of exercise for improving the symptoms.

### **Abbreviations**

FM: fibromyalgia; FACISA/UFRN: Federal University of Rio Grande do Norte, Faculty of Health Sciences of Trairi; VAS: Visual Analogue Scale; FIQ: Fibromyalgia Impact Questionnaire; TUG: Timed Up and Go test; 6MWT: Six-minute Walk Test; PSQI-BR: Pittsburgh Sleep Quality Index – the Brazilian Portuguese version; ESS-BR: Epworth Sleepiness Scale version in Brazilian Portuguese; SF-36: Short Form-36 Health Survey.

### **Acknowledgements**

1  
2  
3 The authors are grateful to participants and FACISA/UFRN and the research director  
4 (PROPESQ/UFRN Edital N° 01/2017) for the support given to the research.  
5

### 6 **Funding**

7  
8 Not applicable.  
9

### 10 **Availability of data and material**

11  
12 Not applicable.  
13

### 14 **Authors' contributions**

15  
16 CAAL and MCS lead the study design and design and planned the statistical analysis.  
17 HJAS, TTXN, VPSS and RTJC have made substantial contributions to the design and  
18 design of the study. HJAS, CAAL, MCS, TTXN, VPSS and RTJC reviewed the  
19 manuscript critically and gave final approval for publication.  
20  
21

### 22 **Competing interests**

23  
24 The authors declare that they have no competing interests.  
25

### 26 **Consent for publication**

27  
28 Not applicable.  
29

### 30 **Ethics approval and consent to participate**

31  
32 This study was approved by the Ethics Committee of Federal University of Rio Grande  
33 do Norte, Faculty of Health Sciences of Trairi – (FACISA/UFRN) with registration code  
34 2.116.314. The ethical principles agreed in the Declaration of Helsinki will be respected  
35 for all study procedures. Respect for individuals will be insured and their autonomy will  
36 be maintained. Participants will be informed of the study objectives, its risks and benefits.  
37 Participants will be free to abandon the study at any time without the obligation of giving  
38 any explanation. Participants must sign the informed consent before the study begins.  
39 This study protocol is registered in ClinicalTrials.gov (a U.S. National Institutes of Health  
40 service) with the identifier NCT03149198, published on 11th May, 2017.  
41  
42  
43  
44  
45  
46  
47  
48  
49

### 50 **References**

51  
52  
53  
54 1. Gowans SE, Dehuek A, Voss S, Silaj A, Abbey SE. Six- Month and One-Year  
55 Followup of 23 Weeks of Aerobic Exercise for Individuals With Fibromyalgia. Arthritis  
56 Rheum. 2004;51:890-8.  
57  
58  
59  
60

- 1  
2  
3 2. Figueroa A, Kingsley JD, McMillan V, Panton LB. Resistance Exercise Training  
4 Improves Heart Rate Variability in Women With Fibromyalgia. *Clin Physiol Funct*  
5 *Imaging*. 2008;28:49-54.  
6  
7
- 8  
9 3. de Oliveira FS, de Almeida Silva HJ, de Pontes Oliveira JM, da Silva JFC, Silva Gomes  
10 VL, Fonseca DS, et al. The sophrology as adjuvant therapy may improve the functionality  
11 of patients with fibromyalgia. A pilot randomized controlled trial. *MTP&RehabJournal*.  
12 2016;14:386.  
13  
14
- 15  
16 4. Heymann ER, Paiva ES, Junior MH, Polak DF, Martinez JE, Proveza JR, et al.  
17 Consenso brasileiro do tratamento da fibromialgia. *Rev bras de reumatol*. 2010;50(1):56-  
18 66.  
19  
20
- 21  
22 5. Hoffman DL, Dukes EM. The health status burden of people with fibromyalgia: a  
23 review of studies that assessed health status with the SF-36 or the SF-12. *Int J Clin Pract*.  
24 2008;62(1):115-26.  
25  
26
- 27  
28 6. Talotta R, Bazzichi L, Di Franco M, Casale R, Batticciotto A, Gerardi MC, et al. One  
29 year in review 2017: fibromyalgia. *Clin Exp Rheumatol*. 2017;;35 Suppl 105(3):6-12.  
30 Epub 2017 Jun 28.  
31  
32
- 33  
34 7. Hadlandsmyth K, Dailey DL, Rakel BA, Zimmerman MB, Vance CG, Merriwether  
35 EN, et al. Somatic symptom presentations in women with fibromyalgia are differentially  
36 associated with elevated depression and anxiety. *J Health Psychol*. 2017 Oct  
37 1:1359105317736577. doi: 10.1177/1359105317736577. [Epub ahead of print]  
38  
39
- 40  
41 8. Valim V, Natour J, Xiao Y, Pereira AF, Lopes BB, Pollak DF, et al . Effects of physical  
42 exercise on serum levels of serotonin and its metabolite in fibromyalgia: a randomized  
43 pilot study. *Rev Bras Reumatol*. 2013;53 (6):538-41.  
44  
45
- 46  
47 9. Busch AJ, Barber KAR, Overend TJ, Peloso PMJ, Schachter CL. Exercise for treating  
48 fibromyalgia syndrome. *Cochrane Database of Systematic Reviews* 2007, Issue 3.  
49  
50  
51  
52  
53  
54  
55  
56  
57  
58  
59  
60

10. Carville SF, Arendt-Nielsen S, Bliddal H, Blotman F, Branco JC, Buskila D et al. EULAR evidence-based recommendations for the management of fibromyalgia syndrome. *Ann Rheum Dis* 2008; 67:536-41.
11. Bidonde J, Busch AJ, Webber SC, Schachter CL, Danyliw A, Overend TJ, et al. Aquatic exercise training for fibromyalgia. *Cochrane Database Syst Rev*. 2014 Oct 28;(10):CD011336. doi: 10.1002/14651858.CD011336.
12. Natour J, Cazotti Lde A, Ribeiro LH, Baptista AS, Jones A. Pilates improves pain, function and quality of life in patients with chronic low back pain: a randomized controlled trial. *Clin Rehabil*. 2015;29(1):59-68.
13. Altan L, Korkmaz N, Bingol U, Gunay B. Effect of pilates training on people with fibromyalgia syndrome: a pilot study. *Arch Phys Med Rehabil*. 2009;90(12):1983-8.
14. Ekici G, Unal E, Akbayrak T, Vardar-Yagli N, Yakut Y, Karabulut E. Effects of active/passive interventions on pain, anxiety, and quality of life in women with fibromyalgia: Randomized controlled pilot trial. *Women Health*. 2017;57(1):88-107.
15. Wolfe F1, Clauw DJ, Fitzcharles MA, Goldenberg DL, Katz RS, Mease P, et al. The American College of Rheumatology preliminary diagnostic criteria for fibromyalgia and measurement of symptom severity. *Arthritis Care Res (Hoboken)*. 2010; 62(5):600-10.
16. Farrar JT, Young Jr JP, LaMoreaux L, Werth JL, Poole RM. Clinical importance of changes in chronic pain intensity measured on an 11-point numerical pain rating scale. *Pain*. 2001;94(2):149-58.
17. Marques AP; Santos AMB; Assumpção A; Matsutani LA; Lage LV; Pereira CAB. Validação da versão brasileira do fibromialgia impacto questionário (FIQ). *Rev. Bras. Reumatol*. 2006;46 (1): 24-31.
18. Podsiadlo D, Richardson S. The timed "Up & Go": a test of basic functional mobility for frail elderly persons. *J Am Geriatr Soc*. 1991;39(2):142-8.



- 1  
2  
3 19. Bennell K, Dobson F, Hinman R. Measures of physical performance assessments:  
4 Self-Paced Walk Test (SPWT), Stair Climb Test (SCT), Six-Minute Walk Test (6MWT),  
5 Chair Stand Test (CST), Timed Up & Go (TUG), Sock Test, Lift and Carry Test (LCT),  
6 and Car Task. *Arthritis Care Res (Hoboken)*. 2011 Nov;63 Suppl 11:S350-70.  
7  
8
- 9  
10  
11 20. Bertolazi AN, Fagondes SC, Hoff LS, Dartora EG, Miozzo IC, de Barba ME, et al.  
12 Validation of the Brazilian Portuguese version of the Pittsburgh Sleep Quality Index.  
13 *Sleep Med*. 2011;12(1):70-5.  
14  
15
- 16  
17 21. Bertolazi AN, Fagondes SC, Hoff LS, Pedro VD, Menna Barreto SS, Johns MW.  
18 Portuguese-language version of the Epworth sleepiness scale: validation for use in Brazil.  
19 *J Bras Pneumol*. 2009 Sep;35(9):877-83.  
20  
21
- 22  
23  
24 22. Ciconelli RM, Ferraz MB, Santos W, Meinão I, Quaresma MR. Brazilian-Portuguese  
25 version of the SF-36 questionnaire: A reliable and valid quality of life outcome measure.  
26 *Rev. Bras. Reumatol*. 1999; 39, 143–150.  
27  
28
- 29  
30 23. Gustafsson M, Gaston-Johansson F. Pain intensity and health locus of control: a  
31 comparison of patients with fibromyalgia syndrome and rheumatoid arthritis. *Patient*  
32 *Educ Couns*. 1996;29(2):179–88.  
33  
34
- 35  
36 24. Morris S, Li Y, Smith JAM, Dube' S, Burbridge C, Symonds T. Multidimensional  
37 daily diary of fatigue-fibromyalgia-17 items (MDF-fibro-17). part 1: development and  
38 content validity. *BMC Musculoskelet Disord*. 2017;18(1):195.  
39  
40
- 41  
42 25. Brosseau L, Wells GA, Tugwell P, Egan M, Wilson KG, Dubouloz CJ, et al. Ottawa  
43 Panel evidence-based clinical practice guidelines for aerobic fitness exercises in the  
44 management of fibromyalgia: part 1. *Phys Ther*. 2008;88(7):857-71.  
45  
46  
47  
48  
49
- 50  
51 26. Bidonde J, Busch AJ, Schachter CL, Overend TJ, Kim SY, Góes SM, et al. Aerobic  
52 exercise training for adults with fibromyalgia. *Cochrane Database Syst Rev*. 2017 Jun  
53 21;6:CD012700. doi: 10.1002/14651858.CD012700.  
54  
55  
56  
57
- 58  
59 27. Lima TB, Dias JM, Mazquin BF, da Silva CT, Noqueira RM, Marques AP, et al. The  
60

1  
2  
3 effectiveness of aquatic physical therapy in the treatment of fibromyalgia: a systematic  
4 review with meta-analysis. *Clin Rehabil.* 2013;27(10):892-908. doi:  
5 10.1177/0269215513484772.  
6  
7  
8  
9

10  
11 28. Assis MR, Silva LE, Alves AM, Pessanha AP, Valim V, Feldman D, et al. A  
12 randomized controlled trial of deep water running: clinical effectiveness of aquatic  
13 exercise to treat fibromyalgia. *Arthritis Rheum.* 2006 Feb 15;55(1):57-65.  
14  
15  
16

17  
18 29. Rivas Neira S, Pasqual Marques A, Pegito Pérez I, Fernández Cervantes R, Vivas  
19 Costa J. Effectiveness of Aquatic Therapy vs Land-based Therapy for Balance and Pain  
20 in Women with Fibromyalgia: a study protocol for a randomised controlled trial. *BMC*  
21 *Musculoskelet Disord.* 2017;19;18(1):22.  
22  
23  
24  
25

26  
27 30. Sanz-Baños Y, Pastor-Mira MÁ, Lledó A, López-Roig S, Peñacoba C, Sánchez-Meca  
28 J. Do women with fibromyalgia adhere to walking for exercise programs to improve their  
29 health? Systematic review and meta-analysis. *Disabil Rehabil.* 2017;7:1-13.  
30  
31  
32  
33  
34  
35  
36  
37  
38  
39  
40  
41  
42  
43  
44  
45  
46  
47  
48  
49  
50  
51  
52  
53  
54  
55  
56  
57  
58  
59  
60

Figure 1: Flow diagram of the study

1  
2  
3  
4  
5  
6  
7  
8  
9  
10  
11  
12  
13  
14  
15  
16  
17  
18  
19  
20  
21  
22  
23  
24  
25  
26  
27  
28  
29  
30  
31  
32  
33  
34  
35  
36  
37  
38  
39  
40  
41  
42  
43  
44  
45  
46  
47  
48  
49  
50  
51  
52  
53  
54  
55  
56  
57  
58  
59  
60

For peer review only

1  
2  
3  
4  
5  
6  
7  
8  
9  
10  
11  
12  
13  
14  
15  
16  
17  
18  
19  
20  
21  
22  
23  
24  
25  
26  
27  
28  
29  
30  
31  
32  
33  
34  
35  
36  
37  
38  
39  
40  
41  
42  
43  
44  
45  
46  
47  
48  
49  
50  
51  
52  
53  
54  
55  
56  
57  
58  
59  
60

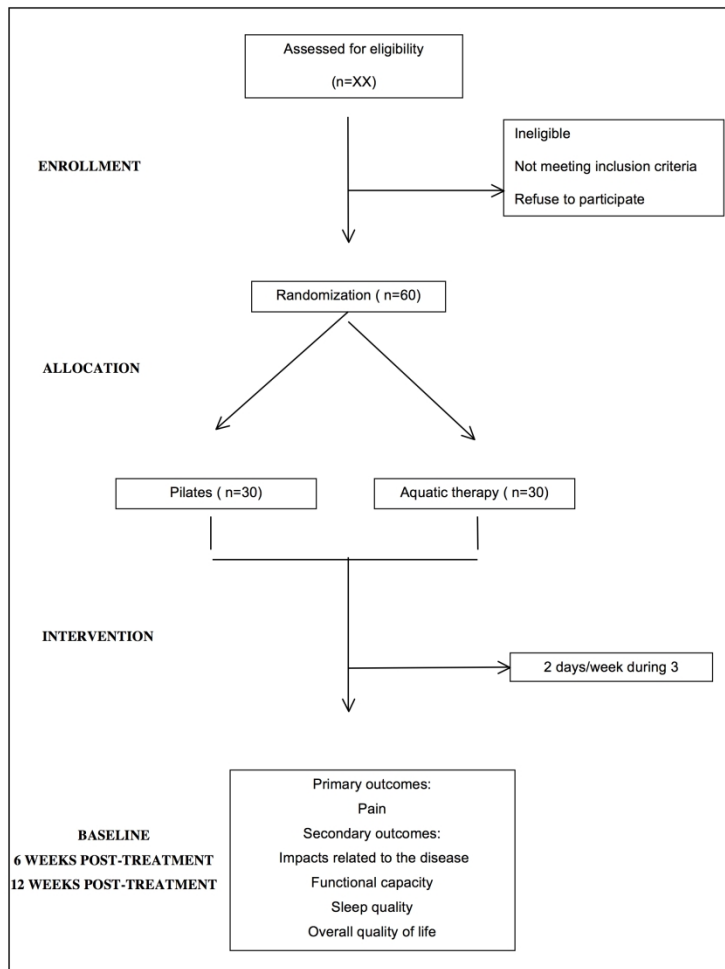

Fig. 1 Flow diagram of the study

Fig. 1 Flow diagram of the study

209x296mm (300 x 300 DPI)

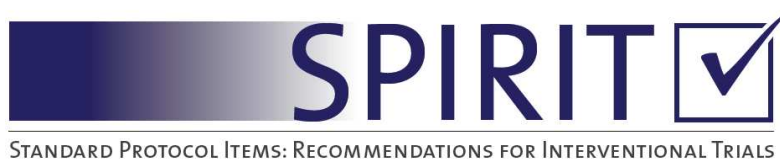

SPIRIT 2013 Checklist: Recommended items to address in a clinical trial protocol and related documents\*

| Section/item                      | Item No | Description                                                                                                                                                                                                                                                                              |
|-----------------------------------|---------|------------------------------------------------------------------------------------------------------------------------------------------------------------------------------------------------------------------------------------------------------------------------------------------|
| <b>Administrative information</b> |         |                                                                                                                                                                                                                                                                                          |
| Title                             | 2       | Descriptive title identifying the study design, population, interventions, and, if applicable, trial acronym                                                                                                                                                                             |
| Trial registration                | 2       | Trial identifier and registry name. If not yet registered, name of intended registry                                                                                                                                                                                                     |
|                                   | N/A     | All items from the World Health Organization Trial Registration Data Set                                                                                                                                                                                                                 |
| Protocol version                  | 8       | Date and version identifier                                                                                                                                                                                                                                                              |
| Funding                           | N/A     | Sources and types of financial, material, and other support                                                                                                                                                                                                                              |
| Roles and responsibilities        | 1       | Names, affiliations, and roles of protocol contributors                                                                                                                                                                                                                                  |
|                                   | 1       | Name and contact information for the trial sponsor                                                                                                                                                                                                                                       |
|                                   | 1       | Role of study sponsor and funders, if any, in study design; collection, management, analysis, and interpretation of data; writing of the report; and the decision to submit the report for publication, including whether they will have ultimate authority over any of these activities |
|                                   | 1       | Composition, roles, and responsibilities of the coordinating centre, steering committee, endpoint adjudication committee, data management team, and other individuals or groups overseeing the trial, if applicable (see Item 21a for data monitoring committee)                         |
| <b>Introduction</b>               |         |                                                                                                                                                                                                                                                                                          |
| Background and rationale          | 3       | Description of research question and justification for undertaking the trial, including summary of relevant studies (published and unpublished) examining benefits and harms for each intervention                                                                                       |
|                                   | 3       | Explanation for choice of comparators                                                                                                                                                                                                                                                    |
| Objectives                        | 5       | Specific objectives or hypotheses                                                                                                                                                                                                                                                        |
| Trial design                      | 5       | Description of trial design including type of trial (eg, parallel group, crossover, factorial, single group), allocation ratio, and framework (eg, superiority, equivalence, noninferiority, exploratory)                                                                                |

1  
2 **Methods: Participants, interventions, and outcomes**

3  
4  
5  
6  
7  
8  
9  
10  
11  
12  
13  
14  
15  
16  
17  
18  
19  
20  
21  
22  
23  
24  
25  
26  
27  
28  
29  
30  
31  
32  
33  
34  
35  
36  
37  
38  
39  
40  
41  
42  
43  
44  
45

|                      |     |                                                                                                                                                                                                                                                                                                                                                                                |
|----------------------|-----|--------------------------------------------------------------------------------------------------------------------------------------------------------------------------------------------------------------------------------------------------------------------------------------------------------------------------------------------------------------------------------|
| Study setting        | 5   | Description of study settings (eg, community clinic, academic hospital) and list of countries where data will be collected. Reference to where list of study sites can be obtained                                                                                                                                                                                             |
| Eligibility criteria | 6   | Inclusion and exclusion criteria for participants. If applicable, eligibility criteria for study centres and individuals who will perform the interventions (eg, surgeons, psychotherapists)                                                                                                                                                                                   |
| Interventions        | 7   | Interventions for each group with sufficient detail to allow replication, including how and when they will be administered                                                                                                                                                                                                                                                     |
|                      | 7   | Criteria for discontinuing or modifying allocated interventions for a given trial participant (eg, drug dose change in response to harms, participant request, or improving/worsening disease)                                                                                                                                                                                 |
|                      | N/A | Strategies to improve adherence to intervention protocols, and any procedures for monitoring adherence (eg, drug tablet return, laboratory tests)                                                                                                                                                                                                                              |
| Outcomes             | N/A | Relevant concomitant care and interventions that are permitted or prohibited during the trial                                                                                                                                                                                                                                                                                  |
|                      | 10  | Primary, secondary, and other outcomes, including the specific measurement variable (eg, systolic blood pressure), analysis metric (eg, change from baseline, final value, time to event), method of aggregation (eg, median, proportion), and time point for each outcome. Explanation of the clinical relevance of chosen efficacy and harm outcomes is strongly recommended |
|                      | 7   | Time schedule of enrolment, interventions (including any run-ins and washouts), assessments, and visits for participants. A schematic diagram is highly recommended (see Figure)                                                                                                                                                                                               |
| Sample size          | 12  | Estimated number of participants needed to achieve study objectives and how it was determined, including clinical and statistical assumptions supporting any sample size calculations                                                                                                                                                                                          |
| Recruitment          | 7   | Strategies for achieving adequate participant enrolment to reach target sample size                                                                                                                                                                                                                                                                                            |

46 **Methods: Assignment of interventions (for controlled trials)**

47 Allocation:

48  
49  
50  
51  
52  
53  
54  
55  
56  
57  
58  
59  
60

|                     |   |                                                                                                                                                                                                                                                                                                                                                          |
|---------------------|---|----------------------------------------------------------------------------------------------------------------------------------------------------------------------------------------------------------------------------------------------------------------------------------------------------------------------------------------------------------|
| Sequence generation | 6 | Method of generating the allocation sequence (eg, computer-generated random numbers), and list of any factors for stratification. To reduce predictability of a random sequence, details of any planned restriction (eg, blocking) should be provided in a separate document that is unavailable to those who enrol participants or assign interventions |
|---------------------|---|----------------------------------------------------------------------------------------------------------------------------------------------------------------------------------------------------------------------------------------------------------------------------------------------------------------------------------------------------------|

|    |                |     |                                                                         |
|----|----------------|-----|-------------------------------------------------------------------------|
| 1  |                |     |                                                                         |
| 2  | Allocation     | 6   | Mechanism of implementing the allocation sequence (eg, central          |
| 3  | concealment    |     | telephone; sequentially numbered, opaque, sealed envelopes),            |
| 4  | mechanism      |     | describing any steps to conceal the sequence until interventions are    |
| 5  |                |     | assigned                                                                |
| 6  |                |     |                                                                         |
| 7  | Implementation | N/A | Who will generate the allocation sequence, who will enrol participants, |
| 8  |                |     | and who will assign participants to interventions                       |
| 9  |                |     |                                                                         |
| 10 | Blinding       | 6   | Who will be blinded after assignment to interventions (eg, trial        |
| 11 | (masking)      |     | participants, care providers, outcome assessors, data analysts), and    |
| 12 |                |     | how                                                                     |
| 13 |                |     |                                                                         |
| 14 |                | 6   | If blinded, circumstances under which unblinding is permissible, and    |
| 15 |                |     | procedure for revealing a participant's allocated intervention during   |
| 16 |                |     | the trial                                                               |
| 17 |                |     |                                                                         |

### Methods: Data collection, management, and analysis

|    |                 |     |                                                                          |
|----|-----------------|-----|--------------------------------------------------------------------------|
| 18 |                 |     |                                                                          |
| 19 |                 |     |                                                                          |
| 20 | Data collection | 12  | Plans for assessment and collection of outcome, baseline, and other      |
| 21 | methods         |     | trial data, including any related processes to promote data quality (eg, |
| 22 |                 |     | duplicate measurements, training of assessors) and a description of      |
| 23 |                 |     | study instruments (eg, questionnaires, laboratory tests) along with      |
| 24 |                 |     | their reliability and validity, if known. Reference to where data        |
| 25 |                 |     | collection forms can be found, if not in the protocol                    |
| 26 |                 |     |                                                                          |
| 27 |                 |     |                                                                          |
| 28 |                 | 12  | Plans to promote participant retention and complete follow-up,           |
| 29 |                 |     | including list of any outcome data to be collected for participants who  |
| 30 |                 |     | discontinue or deviate from intervention protocols                       |
| 31 |                 |     |                                                                          |
| 32 | Data            | N/A | Plans for data entry, coding, security, and storage, including any       |
| 33 | management      |     | related processes to promote data quality (eg, double data entry;        |
| 34 |                 |     | range checks for data values). Reference to where details of data        |
| 35 |                 |     | management procedures can be found, if not in the protocol               |
| 36 |                 |     |                                                                          |
| 37 | Statistical     | 12  | Statistical methods for analysing primary and secondary outcomes.        |
| 38 | methods         |     | Reference to where other details of the statistical analysis plan can be |
| 39 |                 |     | found, if not in the protocol                                            |
| 40 |                 |     |                                                                          |
| 41 |                 |     |                                                                          |
| 42 |                 | 12  | Methods for any additional analyses (eg, subgroup and adjusted           |
| 43 |                 |     | analyses)                                                                |
| 44 |                 |     |                                                                          |
| 45 |                 | 12  | Definition of analysis population relating to protocol non-adherence     |
| 46 |                 |     | (eg, as randomised analysis), and any statistical methods to handle      |
| 47 |                 |     | missing data (eg, multiple imputation)                                   |
| 48 |                 |     |                                                                          |

### Methods: Monitoring

|    |                 |     |                                                                      |
|----|-----------------|-----|----------------------------------------------------------------------|
| 49 |                 |     |                                                                      |
| 50 |                 |     |                                                                      |
| 51 | Data monitoring | N/A | Composition of data monitoring committee (DMC); summary of its role  |
| 52 |                 |     | and reporting structure; statement of whether it is independent from |
| 53 |                 |     | the sponsor and competing interests; and reference to where further  |
| 54 |                 |     | details about its charter can be found, if not in the protocol.      |
| 55 |                 |     | Alternatively, an explanation of why a DMC is not needed             |
| 56 |                 |     |                                                                      |
| 57 |                 |     |                                                                      |
| 58 |                 |     |                                                                      |
| 59 |                 |     |                                                                      |
| 60 |                 |     |                                                                      |

|    |          |     |                                                                                                                                                                                   |
|----|----------|-----|-----------------------------------------------------------------------------------------------------------------------------------------------------------------------------------|
| 1  |          | N/A | Description of any interim analyses and stopping guidelines, including who will have access to these interim results and make the final decision to terminate the trial           |
| 2  |          |     |                                                                                                                                                                                   |
| 3  |          |     |                                                                                                                                                                                   |
| 4  |          |     |                                                                                                                                                                                   |
| 5  |          |     |                                                                                                                                                                                   |
| 6  | Harms    | N/A | Plans for collecting, assessing, reporting, and managing solicited and spontaneously reported adverse events and other unintended effects of trial interventions or trial conduct |
| 7  |          |     |                                                                                                                                                                                   |
| 8  |          |     |                                                                                                                                                                                   |
| 9  |          |     |                                                                                                                                                                                   |
| 10 | Auditing | N/A | Frequency and procedures for auditing trial conduct, if any, and whether the process will be independent from investigators and the sponsor                                       |
| 11 |          |     |                                                                                                                                                                                   |
| 12 |          |     |                                                                                                                                                                                   |
| 13 |          |     |                                                                                                                                                                                   |

### 14 Ethics and dissemination

|    |                               |      |                                                                                                                                                                                                                                                                                     |
|----|-------------------------------|------|-------------------------------------------------------------------------------------------------------------------------------------------------------------------------------------------------------------------------------------------------------------------------------------|
| 15 |                               |      |                                                                                                                                                                                                                                                                                     |
| 16 | Research ethics approval      | 16   | Plans for seeking research ethics committee/institutional review board (REC/IRB) approval                                                                                                                                                                                           |
| 17 |                               |      |                                                                                                                                                                                                                                                                                     |
| 18 |                               |      |                                                                                                                                                                                                                                                                                     |
| 19 | Protocol amendments           | 16   | Plans for communicating important protocol modifications (eg, changes to eligibility criteria, outcomes, analyses) to relevant parties (eg, investigators, REC/IRBs, trial participants, trial registries, journals, regulators)                                                    |
| 20 |                               |      |                                                                                                                                                                                                                                                                                     |
| 21 |                               |      |                                                                                                                                                                                                                                                                                     |
| 22 |                               |      |                                                                                                                                                                                                                                                                                     |
| 23 |                               |      |                                                                                                                                                                                                                                                                                     |
| 24 | Consent or assent             | 16   | Who will obtain informed consent or assent from potential trial participants or authorised surrogates, and how (see Item 32)                                                                                                                                                        |
| 25 |                               |      |                                                                                                                                                                                                                                                                                     |
| 26 |                               |      |                                                                                                                                                                                                                                                                                     |
| 27 |                               |      |                                                                                                                                                                                                                                                                                     |
| 28 |                               | N/A  | Additional consent provisions for collection and use of participant data and biological specimens in ancillary studies, if applicable                                                                                                                                               |
| 29 |                               |      |                                                                                                                                                                                                                                                                                     |
| 30 | Confidentiality               | 16   | How personal information about potential and enrolled participants will be collected, shared, and maintained in order to protect confidentiality before, during, and after the trial                                                                                                |
| 31 |                               |      |                                                                                                                                                                                                                                                                                     |
| 32 |                               |      |                                                                                                                                                                                                                                                                                     |
| 33 |                               |      |                                                                                                                                                                                                                                                                                     |
| 34 |                               |      |                                                                                                                                                                                                                                                                                     |
| 35 | Declaration of interests      | 16   | Financial and other competing interests for principal investigators for the overall trial and each study site                                                                                                                                                                       |
| 36 |                               |      |                                                                                                                                                                                                                                                                                     |
| 37 |                               |      |                                                                                                                                                                                                                                                                                     |
| 38 | Access to data                | N/A  | Statement of who will have access to the final trial dataset, and disclosure of contractual agreements that limit such access for investigators                                                                                                                                     |
| 39 |                               |      |                                                                                                                                                                                                                                                                                     |
| 40 |                               |      |                                                                                                                                                                                                                                                                                     |
| 41 |                               |      |                                                                                                                                                                                                                                                                                     |
| 42 | Ancillary and post-trial care | N./A | Provisions, if any, for ancillary and post-trial care, and for compensation to those who suffer harm from trial participation                                                                                                                                                       |
| 43 |                               |      |                                                                                                                                                                                                                                                                                     |
| 44 |                               |      |                                                                                                                                                                                                                                                                                     |
| 45 | Dissemination policy          | N/A  | Plans for investigators and sponsor to communicate trial results to participants, healthcare professionals, the public, and other relevant groups (eg, via publication, reporting in results databases, or other data sharing arrangements), including any publication restrictions |
| 46 |                               |      |                                                                                                                                                                                                                                                                                     |
| 47 |                               |      |                                                                                                                                                                                                                                                                                     |
| 48 |                               |      |                                                                                                                                                                                                                                                                                     |
| 49 |                               |      |                                                                                                                                                                                                                                                                                     |
| 50 |                               | N/A  | Authorship eligibility guidelines and any intended use of professional writers                                                                                                                                                                                                      |
| 51 |                               |      |                                                                                                                                                                                                                                                                                     |
| 52 |                               |      |                                                                                                                                                                                                                                                                                     |
| 53 |                               | N/A  | Plans, if any, for granting public access to the full protocol, participant-level dataset, and statistical code                                                                                                                                                                     |
| 54 |                               |      |                                                                                                                                                                                                                                                                                     |
| 55 |                               |      |                                                                                                                                                                                                                                                                                     |
| 56 |                               |      |                                                                                                                                                                                                                                                                                     |
| 57 |                               |      |                                                                                                                                                                                                                                                                                     |
| 58 |                               |      |                                                                                                                                                                                                                                                                                     |
| 59 |                               |      |                                                                                                                                                                                                                                                                                     |
| 60 |                               |      |                                                                                                                                                                                                                                                                                     |



**Appendices**

|                            |     |                                                                                                                                                                                                |
|----------------------------|-----|------------------------------------------------------------------------------------------------------------------------------------------------------------------------------------------------|
| Informed consent materials | N/A | Model consent form and other related documentation given to participants and authorised surrogates                                                                                             |
| Biological specimens       | N/A | Plans for collection, laboratory evaluation, and storage of biological specimens for genetic or molecular analysis in the current trial and for future use in ancillary studies, if applicable |

---

\*It is strongly recommended that this checklist be read in conjunction with the SPIRIT 2013 Explanation & Elaboration for important clarification on the items. Amendments to the protocol should be tracked and dated. The SPIRIT checklist is copyrighted by the SPIRIT Group under the Creative Commons "[Attribution-NonCommercial-NoDerivs 3.0 Unported](#)" license.
